1 **Disruption of lactate metabolism in the peripheral nervous system leads to motor-**  
2 **selective deficits**

3

4 A. Joseph Bloom<sup>1,2</sup>, Amber R. Hackett<sup>1</sup>, Amy Strickland<sup>1</sup>, Yurie Yamada<sup>1</sup>, Joseph  
5 Ippolito<sup>3,4</sup>, Robert E. Schmidt<sup>5</sup>, Yo Sasaki<sup>1</sup>, Aaron DiAntonio<sup>2,6</sup> and Jeffrey Milbrandt<sup>1,2</sup>

6

7 <sup>1</sup> Department of Genetics, Washington University School of Medicine, St. Louis, 63110,  
8 United States

9 <sup>2</sup> Needleman Center for Neurometabolism and Axonal Therapeutics

10 <sup>3</sup> Department of Radiology, Washington University School of Medicine, St. Louis, MO  
11 63110, USA

12 <sup>4</sup> Department of Biochemistry and Molecular Biophysics, Washington University School  
13 of Medicine, St. Louis, MO 63110, USA

14 <sup>5</sup> Department of Pathology and Immunology, Division of Neuropathology, Washington  
15 University School of Medicine, St. Louis, MO, USA.

16 <sup>6</sup> Department of Developmental Biology, Washington University School of Medicine, St.  
17 Louis, 63110, United States

18

19 **Abstract**

20

21 Schwann cells (SCs) myelinate and provide trophic support to axons in the peripheral  
22 nervous system (PNS) and disruption of SC cellular metabolism leads to demyelination  
23 and axon degeneration, both symptoms of peripheral neuropathies. The lactate shuttle  
24 hypothesis proposes that glycolytic support cells supply lactate to adjacent axons to  
25 sustain their high metabolic demands, a process that requires the interconversion of  
26 lactate and pyruvate via lactate dehydrogenase (LDH) in both SCs and neurons. To test  
27 this hypothesis in the PNS, we selectively knocked out the genes for both LDH  
28 enzymes, LDHA and LDHB, in motor neurons (MNs), sensory neurons (SNs), or SCs.  
29 Interestingly, motor axons and their synapses progressively degenerate when LDH is  
30 deleted from either MNs or SCs; however, defects in sensory axons or their terminals  
31 were not observed when LDH was excised from either SNs or SCs. Deletion of LDH in

1 SCs also leads to a decrease in total ATP levels in peripheral nerves despite a marked  
2 accumulation of pyruvate and glycolytic intermediates, consistent with the failure of  
3 pyruvate to lactate conversion in SCs leading to energetic deficits in axons. These  
4 results support a model in which motor axons are more dependent on SC-derived  
5 lactate than are sensory axons, a specific dependency that suggests LDH and lactate  
6 shuttling influence the course of motor-dominated neuropathies such as ALS.

7

8

## 1 Introduction

2

3 Schwann cells (SCs), the major support cells in the PNS, both myelinate and provide  
4 trophic support to axons<sup>1</sup>. Not surprisingly, disruption of metabolism specifically in SCs  
5 leads to defects in myelination and axon degeneration, both symptoms of peripheral  
6 neuropathy<sup>2-8</sup>. The lactate shuttle hypothesis proposes that glycolytic support cells  
7 actively produce lactate and transfer it to neurons to supplement their high metabolic  
8 demands<sup>9</sup>. Once transported from a SC into an axon, lactate is available for conversion  
9 to pyruvate and mitochondrial ATP production as well as macromolecular synthesis<sup>10</sup>. A  
10 few key pieces of evidence support this hypothesis. SCs store glycogen while axons do  
11 not<sup>11</sup>, and axonal and neuromuscular junction (NMJ) defects occur in mice that lack the  
12 lactate transporter MCT1 specifically in SCs<sup>12,13</sup>. However, these MCT1-deficient mice  
13 do not completely abrogate lactate shuttling from SCs to axons, perhaps due to other  
14 MCTs or other lactate transport mechanisms.

15

16 Lactate dehydrogenase (LDH) is the enzyme responsible for the interconversion of  
17 pyruvate and lactate. Functional LDH is a tetramer comprised of combinations of two  
18 main subunits, LDHA and LDHB. A third isoform, LDHC, is expressed only in testis.  
19 While both LDHA and LDHB can catalyze the bidirectional interconversion of pyruvate  
20 and lactate, LDHA has a higher affinity for pyruvate than lactate, while LDHB has a  
21 higher affinity for lactate than pyruvate<sup>14-16</sup>. As the equilibrium of this interconversion is  
22 dependent on substrate concentrations, to abolish LDH activity it is necessary to delete  
23 both LDHA and LDHB<sup>17</sup>. Therefore, to determine the influence of SC lactate production  
24 on axonal maintenance, we deleted the *Ldha* and *Ldhb* genes specifically in motor  
25 neurons (MN), sensory neurons (SN), or SCs. In this manner, we prevented  
26 interconversion of pyruvate and lactate in either the axonal compartment or the  
27 surrounding glial cells, hence blocking potential lactate traffic between these  
28 compartments. We found progressive motor deficits in mice lacking LDH in either SCs  
29 or motor neurons. However, loss of LDH in sensory neurons or SCs did not cause  
30 significant sensory deficits. Motor deficits included functional abnormalities and  
31 pathological changes in both axons and NMJs. These results show that motor axons

1 depend on lactate shuttling from SCs to meet their metabolic needs, while sensory  
2 axons appear to use other metabolic pathways to support their function. Based on this  
3 striking dichotomy of motor vs. sensory axon metabolic requirements, we hypothesize  
4 that LDH activity and lactate shuttling may contribute to motor-dominated neuropathies  
5 including ALS.

6

## 7 **Methods**

### 8 *Animals*

9 All animal experiments were performed under direction of institutional animal study  
10 guidelines at Washington University, St. Louis, MO. Floxed *Ldha* (*Ldha*<sup>F/F</sup>) mice were  
11 generated by breeding *Ldha*<sup>tm1a(EUCOMM)Wtsi</sup> mice (EMMA, EM:05082, Jax Stock No:  
12 030112)<sup>18</sup> to mice that express FLP recombinase ACTB:FLPe B6;SJL (Jax Stock No:  
13 003800)<sup>19</sup>. Floxed *Ldhb* (*Ldhb*<sup>F/F</sup>) mice were generated by breeding *Ldhb*<sup>tm1a(KOMP)Wtsi</sup>  
14 mice (EMMA, EM:08936)<sup>20</sup> to mice that express FLP recombinase. To generate  
15 Schwann cell, motor neuron or sensory neuron-specific LDH knockout mice, doubly  
16 mutant *Ldha*<sup>F/F</sup>; *Ldhb*<sup>F/F</sup> mice were bred to either MPZ-Cre<sup>+</sup><sup>21</sup>, ChAT-Cre<sup>+</sup> (Jax Stock  
17 No: 006410)<sup>22</sup> or Na<sub>v</sub>1.8-Cre<sup>+</sup> mice<sup>23</sup> respectively. The Cre-expressing mouse strains  
18 were previously back-crossed to C57BL/6N >10 generations. All experimental mice  
19 were therefore of mixed C57BL/6N and B6Brd;B6Dnk;B6N-Tyr genetic background.  
20 Littermate controls consisted of Cre<sup>-</sup> mice in all experiments. Except where specifically  
21 mentioned, male and female mice were used in approximately equal numbers in all  
22 experiments. Sciatic nerve crush experiments were performed as previously  
23 described<sup>3,24</sup>.

24

### 25 *Mouse Behavior*

26 The inverted screen test was performed as previously described<sup>24</sup>. If a mouse did not  
27 fall within 120 s, then the time was recorded as 120 s. The tail flick assay was  
28 performed as previously described<sup>24,25</sup>. The Von Frey assay was performed as  
29 previously described<sup>24,26</sup>. To begin, mice were stimulated with filaments  
30 (Semmes-Weinstein monofilaments, Stoelting) for 2 s in the center of the foot between  
31 the footpads starting at 0.32 g of force. Subsequently, the up-down method<sup>27</sup> was

1 used. Mice were stimulated four times after the first change in withdrawal for each foot  
2 separately. The withdrawal threshold was calculated and the values for each foot were  
3 averaged.

#### 4 5 *Nerve electrophysiology*

6 The compound muscle action potential (CMAP) and sensory nerve action potential  
7 (SNAP) were acquired as previously described<sup>26,28</sup> using a Viking Quest  
8 electromyography device (Nicolet). Mice were anesthetized using isoflurane, then for  
9 CMAP, the recording electrodes were placed in the footpad and stimulating electrodes  
10 in either the ankle or sciatic notch. For SNAP recording, electrodes were inserted  
11 subcutaneously into the tail. The recording electrode was inserted at the base of the tail,  
12 the stimulating electrode was inserted 30 mm distal to the recording electrode, and the  
13 ground was inserted between the stimulating and recording electrodes. Supramaximal  
14 stimulation was used for CMAP and SNAP.

#### 15 16 *QPCR*

17 QPCR was performed as previously described<sup>29</sup>. Primer sequences were as follows:  
18  $\beta$ -Actin (Forward GACATGGAGAAGATCTGGCA; Reverse  
19 GGTCTCAAACATGATCTGGGT), LDHA (Forward TGTCTCCAGCAAAGACTACTGT;  
20 Reverse GACTGTACTTGACAATGTTGGGA), and LDHB (Forward:  
21 CATTGCGTCCGTTGCAGATG; Reverse GGAGGAACAAGCTCCCGTG).

#### 22 23 *LDH flux assay*

24 LDH flux assay was performed as previously described<sup>30</sup>. Sciatic nerves were dissected  
25 from 3-month-old isoflurane anesthetized mice, epineurium removed in PBS, nerves  
26 cut into 4 approximately equal segments, and the nerve segments placed in uncoated  
27 12 well plates with Neurobasal Media without glucose or pyruvate (ThermoFisher  
28 Scientific A2477501) supplemented with 10 mM <sup>13</sup>C<sub>6</sub>-glucose for 24 hours. Samples  
29 were removed, washed with PBS, snap frozen on dry ice and stored at -80°C. Tissue  
30 was sonicated in 50% MeOH and the extract was evaporated under nitrogen gas and  
31 were derivatized with 14  $\mu$ L of 20 mg/mL methoxyamine HCl in pyridine and incubated

1 at 38°C for 90 min. Immediately following the 90 min incubation, 56 µL of MTBSTFA  
2 with 1% t-BDMCS were added and samples were incubated at 38°C for 30 min<sup>30,31</sup>.  
3 Derivatized samples were run on an Agilent 7890A GC coupled to an Agilent 5975C MS  
4 and data was acquired and analyzed in MSD ChemStation E.02.02.1431 (Agilent). The  
5 GC temperature program was set to: initial temperature: 60°C, hold for 0.65 min;  
6 temperature rate 1: 11.5°C/min to 201°C, hold for 0.65 min; temperature rate 2:  
7 3.5°C/minute to 242°C, hold for 0 min; temperature rate 3: 16°C/min to 300°C, hold for 7  
8 minutes. Data on all isotopologues was collected in SIM mode. Isotopologue peak areas  
9 in each sample were normalized in FluxFix<sup>32</sup> to isotopologues of unlabeled samples to  
10 adjust for the natural abundance of each isotopologue.

### 11 12 *Steady state metabolomics*

13 Steady state metabolite measurement was performed as previously described<sup>33</sup>, for 3  
14 and 6-month-old WT and SCKO mice. Briefly, sciatic nerves from 3-month-old mice  
15 were quickly dissected, the epineurium was removed in ice cold PBS, snap frozen on  
16 dry ice, and stored at -80°C. Metabolites were extracted by homogenizing frozen sciatic  
17 nerves in 50% MeOH (100 µL per nerve) using sonication and incubated 10 min on ice.  
18 The homogenates were centrifuged (10,000 × g for 15 min), and the supernatants  
19 containing small metabolites and the precipitates containing proteins were collected.  
20 The metabolite-containing fractions were further purified with chloroform (50 µL)  
21 extraction. The precipitates containing proteins were solubilized by adding 0.1% SDS  
22 solution (100 µL per nerve), and the protein content was determined using BCA protein  
23 assay kit (Thermo Fisher Scientific). The aqueous phase (90 µl) was lyophilized and  
24 stored at -20°C until analysis. Lyophilized samples were reconstituted with 5  
25 mM ammonium formate.

26 For the measurement of metabolites including NAD<sup>+</sup> and ATP, samples were injected  
27 into a C18 reverse phase column (Atlantis T3, 2.1 x 150 mm, 3 µm; Waters) using  
28 HPLC (Agilent 1290 LC) at a flow rate of 0.15 ml/min with 5 mM ammonium formate  
29 for mobile phase A and 100% methanol for mobile phase B. Metabolites were eluted  
30 with gradients of 0–10 min, 0–70% B; 10–15 min, 70% B; 16–20 min, 0% B. The  
31 metabolites were detected with a triple quad mass spectrometer (Agilent 6470

1 MassHunter; Agilent) under positive ESI multiple reaction monitoring (MRM) using  
2 parameters specific for each compound (NAD<sup>+</sup>, 664>428, fragmentation (F) = 160 V,  
3 collision (C) = 22 V, and cell acceleration (CA) = 7 V: ATP 508>136, F=90 V, C=30 V,  
4 CA = 27 V). Serial dilutions of standards for each metabolite in 5 μM ammonium  
5 formate were used for calibration. Metabolites were quantified by MassHunter  
6 quantitative analysis tool (Agilent) with standard curves and normalized by the protein.  
7 Alternative metabolite analysis targeting metabolites in the glycolysis pathway was  
8 performed as instructed (Metabolomics dMRM Database and Method, Agilent  
9 Technologies). Samples were chromatographically separated using a reverse phase  
10 column (Zorbax RRHD Extend-C18, 2.1 × 150 mm, 1.8 μm, Agilent Technologies) with  
11 mobile buffer A (3% MeOH, 10 mM tributylamine, 15 mM acetic acid) and 0%–99%  
12 gradient of buffer B (100% MeOH, 10 mM tributylamine, 15 mM acetic acid). Metabolites  
13 were analyzed by mass spectrometer (6470, Agilent Technologies) using dynamic  
14 multiple reaction monitoring. The compound signatures, including retention time and  
15 qualifying ions, are predetermined in the dynamic multiple reaction monitoring database  
16 and data analysis tool automatically detect these compounds. The relative amount of  
17 each metabolites was calculated and normalized by the amount of protein.”

18

### 19 *Nerve structural analysis using light and electron microscopy*

20 Sciatic, sural, and the motor branch of the femoral nerve were processed as previously  
21 described with modifications<sup>24,26,29</sup>. First, nerves were pinned onto a Sylgard plate to  
22 maintain orientation while incubated overnight at 4°C in 3% glutaraldehyde in 0.1 M PB  
23 (Polysciences). Next, nerves were sutured to demarcate the most distal region. They  
24 were washed with PB and incubated overnight at 4°C in 1% osmium tetroxide  
25 (Sigma-Aldrich). After washing, nerves were dehydrated in a serial gradient of ethanol  
26 from 50 to 100%, incubated in 50% propylene oxide/50% ethanol then 100% propylene  
27 oxide. Nerves were then placed in Araldite resin solution/propylene oxide solutions  
28 overnight in the following ratios: 50:50, 70:30, 90:10. Each nerve was cut in half and a  
29 block was made for the most distal and proximal portions. These fragments were  
30 embedded in 100% Araldite resin solution (Araldite: DDSA: DMP30; 12:9:1; Electron  
31 Microscopy Sciences) and baked overnight at 60°C. The blocks were cut using Leica

1 EM UC7 Ultramicrotome to generate semithin sections 400–600 nm thick which were  
2 dried onto microscopy slides. For electron microscopy, blocks were cut into 300–  
3 400 nm sections and collected on copper grids. The grids were stained with uranyl  
4 acetate and lead citrate before imaging using a transmission electron microscope  
5 (JEOL1200).

6

#### 7 *Toluidine blue staining and quantification*

8 Prewarmed slides with 400–600 nm sections were stained for 1 minute with 1%  
9 toluidine blue solution (1% toluidine blue, 2% borax), vigorously washed with water,  
10 acetone, then xylene. Slides were mounted with Cytoseal XYL (Thermo Fisher  
11 Scientific). Whole nerves were imaged (sciatic at 10x, femoral at 20x, and sural at 40x  
12 magnification) and 3 random fields were obtained using a 100x oil-immersion lens. All of  
13 the myelinated axons in each image were counted and categorized into one of six  
14 categories—*normal*, *degenerated*, *hyper-myelinated*, *naked*, *onion bulb*, or *regenerated*  
15 *cluster*—by a trained observer blinded to genotype. Counts were normalized per square  
16 millimeter and averaged over three fields. Cell nuclei were similarly counted. To  
17 determine axon diameter and G-ratio, 40 axons per mouse were measured and  
18 analyzed using ImageJ. Degenerated axons were excluded from axonal diameter and  
19 G-ratio calculations.

20

#### 21 *Muscle Fiber Cross-sectional area*

22 Tibialis anterior muscles were dissected from mice transcardially perfused with 4%  
23 paraformaldehyde in PBS (PFA), postfixed for 1 hour at room temperature, then  
24 incubated for 48 hr in 30% sucrose in PBS. Samples were embedded in O.C.T. and  
25 sectioned at 10 μm using a cryostat. Sections were mounted on positively charged  
26 slides and stored at –20°C. Slides were postfixed in ice-cold acetone for 5 minutes,  
27 washed with PBS, blocked with 5% normal goat serum in PBST, then incubated in  
28 primary antibody (Laminin, Sigma (#L9393))

29

#### 30 *NMJ staining and analysis*



1 Lumbrical muscles dissected from mice transcardially perfused with 4% PFA were post-  
2 fixed in 4% PFA overnight and washed thrice for 15 min in PBS. Samples were  
3 permeabilized with 2% TritonX-100/PBS (PBST) for 30 min, and blocked with 4%  
4 bovine serum albumin (BSA) in 0.3% PBST for 30 mins at room temperature. Muscles  
5 were incubated with anti-SV2 (Developmental Studies Hybridoma Bank AB2315387,  
6 1:200) and anti-2H3 (Developmental Studies Hybridoma Bank AB2314897, 1:100) for  
7 48 hr at 4°C. After incubation with primary antibodies, muscles were incubated with  
8 FITC rabbit anti-mouse IgG (Invitrogen A21121, 1/400) overnight at 4°C. The samples  
9 were then incubated with CF 568 conjugated  $\alpha$ -bungarotoxin (BTX) (Biotium 00006,  
10 1:500) for 2 hr at room temperature. To analyze NMJ morphology, z-stack images using  
11 a confocal microscope (Leica DFC7000T) were obtained. Maximal intensity projection  
12 images were reconstructed, and post-synapse volume and terminal axon diameter were  
13 analyzed using Imaris software.

14

#### 15 *Motor neuron quantification*

16 Paraffin embedded spinal cords were sectioned at 6 microns. After deparaffinization,  
17 antigen retrieval in citrate buffer, pH 6.0 using a pressure cooker for 3 min. Tissues  
18 were incubated with rabbit CHAT antibody 1:300 (Millipore Cat #AB143) overnight at  
19 4C, followed by goat anti-rabbit Cy3 1:500 1hour at RT.

20 CHAT positive cells were counted from 10x images in the ventral horn of the lumbar  
21 region of the spinal cord from 3-6 sections per animal.

22

#### 23 *Intraepidermal nerve fiber quantification*

24 For intraepidermal nerve fiber (IENF) staining and quantification, footpad skin was  
25 dissected and prepared as previously described<sup>26</sup>. The footpads were imaged on a  
26 Leica DMI 4000B confocal microscope using a 20X oil objective and a Leica DFC  
27 7000-T camera. Z-stacks were acquired through the whole sample, max projected, then  
28 exported for quantification. IENF density was quantified as the number of PGP9.5<sup>+</sup>  
29 axons that crossed the basement membrane normalized to the length of the basement  
30 membrane. IENF densities were averaged in three separate sections for each animal.  
31 Imaging and analysis were performed blinded to genotype.

1  
2  
3  
4  
5  
6  
7  
8  
9  
10  
11  
12  
13  
14  
15  
16  
17  
18  
19  
20  
21  
22  
23  
24  
25  
26  
27  
28  
29  
30

## *Statistical Analysis*

Sample number (n) is defined throughout as the number of animals that were independently manipulated and measured. Histology, enzyme assays, and qPCR assays were always performed in 3 or 4 mice, whereas behavior and electrophysiology tests were performed with >5 animals per cohort. Statistics were performed using either Prism (GraphPad) or R.

## **Results**

### ***Motor neurons but not sensory neurons require LDH to maintain axonal integrity***

To be utilized as an energy source to generate ATP, lactate must first be converted to pyruvate by LDH. Therefore, to probe the lactate shuttle hypothesis in the PNS, we generated peripheral neuron specific LDH knockout mice using the Cre-lox system, mating floxed *Ldha/Ldhb* animals to two different mouse lines: 1) ChAT-Cre<sup>+</sup> mice, which express Cre in cholinergic neurons including  $\alpha$ -motor neurons<sup>22</sup>, or 2) Na<sub>v</sub>1.8-Cre<sup>+</sup> mice which express Cre in ~75% of their dorsal root ganglion (DRG) neurons, including most nociceptors and ~40% of A-fibers<sup>23</sup>. Mice lacking both LDHA and LDHB in motor neurons (MNKO mice) using ChAT-Cre or in sensory neurons (SNKO mice) using Na<sub>v</sub>1.8-Cre produced mice that were viable, fertile, and normal in appearance. To determine whether LDH activity is necessary for neuron function and axon maintenance, we subjected MNKO and SNKO mice to batteries of behavioral and electrophysiological tests to assess their respective motor and sensory function over time. Notably, MNKO mice showed significant weakness at six months of age that progressed to more severe motor dysfunction at twelve months (**Fig. 1A**). MNKO did not display a significantly reduced compound muscle action potential (CMAP) amplitude or nerve conduction velocity (NCV) at any age (**Fig. S1**).

1 In striking contrast, no differences in response to thermal or mechanical stimuli were  
2 observed in SNKO mice (**Fig. 1B,C**). The sensory nerve action potential (SNAP)  
3 amplitude and conduction velocity in the tail (**Fig. S1**) were not significantly different  
4 between genotypes, indicating there is no impairment in myelination or reduction in the  
5 number of myelinated axons in the sensory nerves of SNKO mice.

6  
7 We next analyzed the morphology of the predominantly sensory sural nerve<sup>34</sup> and the  
8 motor branch of the femoral nerve in 12 month old LDH-deficient mice. SNKO mice  
9 showed no signs of axonal degeneration or obvious defects in nerve morphology (**Fig.**  
10 **1D-G**), consistent with the lack of sensory functional deficits. In contrast, MNKO mice  
11 had fewer total axons in the femoral nerve, with particularly large losses of larger  
12 diameter axons, and an increased number of degenerated axons (**Fig. 1H-K**). In the  
13 PNS, axon degeneration stimulates compensatory axon regeneration. While  
14 regenerating axon clusters and onion bulbs were not observed in femoral nerves of  
15 control animals (n=6), both were found frequently in MNKO femoral nerves (n=4,  
16  $454 \pm 81$  regenerating clusters/mm<sup>2</sup>,  $p < 1 \times 10^{-4}$ ;  $558 \pm 180$  onion bulbs/mm<sup>2</sup>,  $p < 5 \times 10^{-9}$ ),  
17 findings consistent with ongoing axon degeneration. Consistent with motor axon loss  
18 and motor function deficits, we observed significant neuromuscular junction denervation  
19 of lumbrical muscles in the hind paws in 12-month-old MNKO mice with many  
20 unoccupied endplates (**Fig. 2A-C**). Finally, to determine whether the observed axon  
21 degeneration was accompanied by neuron death, we counted ChAT<sup>+</sup> motor neurons in  
22 the spinal cord of MNKO mice and found no significant difference from wildtype or  
23 SCKO mice at 12 months of age (**Fig. 2D**). In sum, these results strongly suggest that  
24 motor but not sensory neurons are dependent on cell-autonomous LDH activity to  
25 maintain their axons.

26  
27 ***LDH deficiency in Schwann cells leads to reduced pyruvate to lactate conversion***  
28 ***and decreased ATP production in peripheral nerves***

29  
30 According to the lactate shuttle hypothesis, glial cells must produce lactate, which  
31 requires the activity of LDH, and then shuttle it to neurons/axons to support their

1 function. To test this hypothesis in the PNS, we generated Schwann cell-specific  
2 LDHA/B KO mice by mating *Ldha/Ldhb* floxed mice to MPZ-Cre mice<sup>21</sup>. These mice  
3 express Cre in SC precursor cells beginning at E14, well before the initiation of  
4 myelination, which occurs postnatally. These LDH-deficient SC (SCKO) mice are viable,  
5 fertile, and appear overtly normal. The deletion of *Ldha* and *Ldhb* in SCs was detected  
6 by qPCR analysis (**Fig. 2E**). Sciatic nerve segments from SCKO mice were cultured *ex*  
7 *vivo* and total lactate levels were dramatically reduced (**Fig. 2F**), indicating that much of  
8 sciatic nerve lactate production occurs in SCs, as opposed to other cellular components  
9 of the nerve.

10

11 To assess effects on nerve lactate production resulting from loss of LDH in Schwann  
12 cells, we performed a metabolic flux assay using an *ex vivo* sciatic nerve culture system  
13 (**Fig. S2**). Nerves from wildtype and SCKO mice were grown in media supplemented  
14 with <sup>13</sup>C<sub>6</sub>-labeled glucose for 24 hr and metabolites were extracted. All possible lactate  
15 isotopologues derived from <sup>13</sup>C<sub>6</sub>-labeled glucose were measured by GC-MS. The <sup>13</sup>C  
16 labeling pattern in lactate indicated that >70% of lactate in wildtype nerve is derived via  
17 its direct synthesis from glucose via glycolysis. As expected, the loss of LDH in SCs  
18 overwhelmingly blocks this pathway (**Fig. S2**), such that only small amounts of <sup>13</sup>C<sub>6</sub>-  
19 labeled lactate are produced in SCKO nerve.

20

21 To further explore how loss of LDH in SCs alters nerve glycolysis, we measured the  
22 abundance of glycolytic metabolites in wildtype and SCKO sciatic nerves using LC-MS.  
23 We found that glyceraldehyde 3-phosphate, dihydroxyacetone phosphate, and  
24 phosphoenol pyruvate are all significantly increased in the SCKO model (**Fig. 3B-D**).  
25 Pyruvate levels are robustly increased, with a 4-fold difference between SCKO and  
26 wildtype nerves at 3 months, and a 6.7-fold difference at 6 months of age (**Fig. 3E**). We  
27 also observed a trend toward increased levels of pentose phosphate metabolites such  
28 as ribose 5-phosphate and xylose 5-phosphate, and purine metabolism products such  
29 as inosine, hypoxanthine, xanthine, and adenosine in SCKO nerves (**Fig. S3**). Finally,  
30 we observed significantly reduced levels of ATP in SCKO nerves (**Fig. 3F**). Overall,  
31 these data indicate that LDH actively converts pyruvate into lactate in SCs and that

1 deleting LDH in SCs leads to a loss of lactate and an accumulation of pyruvate,  
2 glycolytic metabolites, and other metabolic intermediates (**Fig. 3A**).

3

#### 4 ***Deletion of LDH in Schwann cells leads to progressive motor but not significant*** 5 ***sensory neuropathy***

6

7 To examine the functional consequences of SC LDH loss, we performed motor and  
8 sensory behavioral tests. We found that SCKO mice display a progressive diminution of  
9 strength similar to that observed in the MNKO model (**Fig. 3G,H**), strongly supporting  
10 the findings presented above that motor axons are dependent on lactate to maintain  
11 proper function. The sciatic nerve CMAP amplitudes were also reduced in 12 month old  
12 SCKO mice (**Fig. 3I,J**), suggesting motor axon loss, while CMAP latency was increased  
13 (**Fig. 3K**). NCV was unchanged in SCKO mice at 12 month of age (**Fig. S1**). By  
14 contrast, both behavioral and electrophysiological measures of sensory function appear  
15 normal in 12-month-old SCKO mice (**Fig. 3L-O**).

16

17 We next examined the structure of peripheral nerves in SCKO mice to determine the  
18 basis of the motor deficits. In young animals (P7 and P21), we found no differences in  
19 the number of myelinated axons, myelin thickness, axonal diameter distribution, or  
20 number of SC nuclei between SCKO and control mice (**Fig. S4**), suggesting that PNS  
21 development proceeds normally despite lack of LDH activity in SCs. Surprisingly, we  
22 also observed no difference in the speed or extent of remyelination after nerve injury in  
23 2-month old SCKO mice (**Fig. S5**). In SCKO mice at 3 months of age, the distal sciatic  
24 nerve—which contains both motor and sensory axons—remains grossly normal,  
25 although tomacula and degenerating axons are present (**Fig. 4 & 5**) as are  
26 hypermyelinated axons [SCKO:  $408 \pm 129/\text{mm}^2$  (n=5) vs. WT:  $50 \pm 37/\text{mm}^2$  (n=4),  $p < 0.05$ ].  
27 In older SCKO mice, there is evidence of segmental demyelination in some sectors of  
28 the distal nerve. By 12 months of age most axons in these sectors display thinner  
29 myelin (i.e. higher g-ratio, **Fig. 5A**) and we observed frequent morphological hallmarks  
30 of peripheral neuropathy (n≥3) including tomacula, degenerating axons (**Fig. 5C**), naked  
31 axons ( $105 \pm 12/\text{mm}^2$ ,  $p < 0.005$ ), supernumerary SCs resembling onion bulbs

1 (908±115/mm<sup>2</sup>, p<0.005), and regenerating clusters (several axons wrapped by a  
2 supernumerary SC, 344±55/mm<sup>2</sup>, p<0.01) (**Fig. 4 & 5**). Degeneration is substantially  
3 less severe in the proximal portion of the nerve (**Fig. S6**), suggesting that transport of  
4 metabolites from the cell body bolsters axonal health when SC support is withdrawn.  
5  
6 Tellingly, sectors of the SCKO sciatic nerve that demonstrate evidence of axonal  
7 degeneration mostly contain large diameter axons consistent with distribution of motor  
8 fascicles in this nerve<sup>35</sup>. Therefore, to probe the apparent motor-specificity of these  
9 defects, we again focused on the primarily sensory sural nerve and the motor branch of  
10 the femoral nerve in 12 month old mice. We observed no apparent abnormalities in the  
11 sural nerve (**Fig. 6A-D**) but many morphological changes in the femoral nerve (**Fig. 6E-**  
12 **H**). No differences in the density of axons, number of degenerating axons (**Fig. 6I**) or  
13 axonal diameter (**Fig. 6J, K**) are detected in the sural nerves of SCKOs, whereas their  
14 femoral nerves contain significantly fewer axons (**Fig. 6L**) and those axons that do  
15 remain are smaller in diameter (**Fig. 6M-N**). Femoral nerves from 12-month old SCKO  
16 animals contain significantly more degenerating axons (**Fig. 6L**), regenerating clusters  
17 (737±124/mm<sup>2</sup> (n=3) vs. 0 in controls (n=6), p<5x10<sup>-4</sup>), onion bulbs (1,174±43/mm<sup>2</sup> vs.  
18 0, p<5x10<sup>-9</sup>), and naked axons (67±11/mm<sup>2</sup> vs. 0, p<1x10<sup>-4</sup>). Regenerating clusters and  
19 onion bulbs are hallmarks of peripheral neuropathy and occur in CMT1 (demyelinating),  
20 CMT2 (axonal), and CMTX (X-linked)<sup>36-38</sup>. Overall, these results are consistent with  
21 repetitive axon demyelination and remyelination in the femoral and sciatic nerves of  
22 SCKO mice.

23  
24 To further investigate the motor-selective neural deficits in LDH SCKO mice, we  
25 examined both sensory endings and motor synapses. We first assessed the integrity of  
26 sensory nerve endings in the skin by quantifying intraepidermal nerve fiber (IENF)  
27 density and found no difference in IENF density in 12-month-old mutant mice (**Fig. S7**).  
28 In contrast, examination of the neuromuscular junctions in lumbrical muscles of the  
29 SCKO mice showed significant losses of innervated NMJs (**Fig. 7A-C**). We also found  
30 that SCKO mice have smaller muscle fiber cross-sectional areas (**Fig. 7D-F**), consistent  
31 with muscle atrophy secondary to partial denervation. In sum, these data strongly

1 indicate that motor but not sensory neurons require LDH activity in SCs—and thus SC-  
2 derived lactate—to properly maintain their axons.

3

#### 4 **Discussion**

5

6       Levels of lactate production and lactate shuttling from glial cells to neurons in the  
7 CNS decline with age and are implicated in aging-related disorders including  
8 neurodegenerative diseases<sup>39–41</sup>. While growing evidence indicates parallel  
9 mechanisms in the PNS, the role of lactate metabolism in peripheral nerve degeneration  
10 remains undetermined. To explore the influence of Schwann cell (SC) lactate production  
11 on peripheral axon maintenance, we genetically targeted LDH activity (both the LDHA  
12 and LDHB isoforms) in either neuronal subtypes or SCs. Because LDH is responsible  
13 for interconverting pyruvate and lactate in both ‘lactate producer’ and ‘lactate consumer’  
14 cells, LDH knockout in either cell effectively blocks lactate traffic between the axonal  
15 compartment and surrounding supporting cells. Surprisingly, we found that motor axons  
16 degenerate whether LDH activity is lost from either motor neurons or SCs, whereas  
17 sensory axons show little impact from loss of LDH either from sensory neurons or SCs.  
18 Overall, our results support a model in which motor axons are much more dependent  
19 than sensory axons on the lactate provided by SCs. This striking motor specificity  
20 implicates compromised lactate metabolism and shuttling as a potential pathogenic  
21 mechanism in motor-dominated neuropathies such as ALS.

22

23       Neurons require rapid and copious ATP production to support energetically  
24 demanding functions including propagation of action potentials, synaptic transmission,  
25 cytoskeletal maintenance, and axon transport<sup>42</sup>. Cajal originally proposed that  
26 astrocytes directly supply nutrients to neurons<sup>43</sup>, and over the last quarter century  
27 evidence from multiple model systems has shown that glycolytic support cells  
28 specifically provision lactate to neurons to meet their extraordinary metabolic needs<sup>9,44–</sup>  
29 <sup>49</sup>. Once shuttled into axons, lactate can be converted into pyruvate and consumed by  
30 axonal mitochondria to produce ATP or building blocks for macromolecules. While  
31 lactate shuttling has been amply demonstrated in the CNS, PNS neurons also have

1 high metabolic demands due to their large axons. Key observations indicate a parallel  
2 lactate shuttling pathway in peripheral nerves could play a critical role in peripheral  
3 neuropathy. For example, like astrocytes in the CNS, SCs in the PNS store glycogen  
4 whereas the axons they ensheath do not<sup>11</sup>. After nerve injury, SCs upregulate glycolytic  
5 metabolism to support axons and prevent their degeneration<sup>50</sup>. Mice deficient for  
6 monocarboxylate transporter 1 (MCT1)—which transports lactate, pyruvate and ketone  
7 bodies—in SCs develop spontaneous axonal defects<sup>12,13</sup>, indicating that SCs export a  
8 factor essential to axon health via MCT1. However, the MCT1 SC knockout phenotype  
9 is far milder than defects we observe in SC or motor neuron LDH knockout mice,  
10 suggesting additional mechanisms for lactate export from SCs exist. MCT4 is also  
11 expressed by SCs, but it appears largely dispensable for support of motor axons<sup>48</sup>.  
12 Connexin (CX32) may contribute to lactate transport from SCs to axons, as mutations in  
13 the CX32 gene associated with Charcot Marie Tooth disease type 1X reduce channel  
14 permeability to small molecules including lactate<sup>51–54</sup>. CX32 mutant mice display motor-  
15 specific phenotypes remarkably similar to LDH SCKO mice<sup>55,56</sup>. Although CMT1X has  
16 been traditionally considered a demyelinating neuropathy, axonal changes including  
17 altered cytoskeleton and axonal transport precede demyelination in CMT1X, further  
18 highlighting the importance of the SC metabolic support of axons<sup>38</sup>.

19  
20 SC-specific disruption of metabolism leads to myelination defects and axon  
21 degeneration, principle symptoms of peripheral neuropathy<sup>2–8,57</sup>. In most of these  
22 mutant mice, sensory pathology predominates. For example, deletion of COX10 or  
23 TFAM, proteins important for mitochondrial metabolism, leads to hypomyelination and  
24 progressive axon loss<sup>2–4</sup>. Loss of INSR or IGF1R in SCs results in sensory-specific  
25 peripheral neuropathy<sup>24</sup> and ablation of the central metabolic regulator LKB1 in SCs  
26 results in impaired myelination and progressive small-fiber axon degeneration<sup>5,58</sup>. LKB1-  
27 deficient SCs consume less oxygen and produce more lactate, a compensatory process  
28 that is axoprotective<sup>5,58</sup>. Conversely, when LDH is deleted in SCs, we see oxygen  
29 consumption increase and hypermyelination in the form of tomacula is detected at an  
30 early stage, with demyelination occurring subsequently. In addition to reduced lactate,



1 nerves of LDH SCKO mice have reduced ATP, which may explain some of the axonal  
2 deficits and NMJ abnormalities<sup>59</sup>.

3  
4 While motor and sensory axons apparently have different metabolic needs, SC  
5 subtypes that ensheath motor and sensory axons could also differ in their metabolism.  
6 Single nuclei and bulk RNAseq analyses of peripheral nerves from wildtype and  
7 SOD1<sup>G93A</sup> ALS model mice identified a subpopulation of SCs that preferentially  
8 associate with motor axons and express elevated levels of LDH and other genes related  
9 to pyruvate and NAD metabolism. Crucially, this motor-associated SC population  
10 disappears as motor axon loss progresses in the SOD1<sup>G93A</sup> model<sup>60</sup>.

11  
12 A range of cellular processes are reported to influence liability for the most  
13 common motor neuron disease, ALS. These include aberrant RNA processing, ER  
14 stress, metabolic abnormalities, neuroinflammation, oxidative damage, and  
15 mitochondrial dysfunction, among others<sup>61</sup>. As with many neurodegenerative conditions,  
16 age is the primary risk factor for ALS, and there is clear overlap between pathways  
17 implicated in the disease and natural aging processes<sup>62</sup>. Age-related changes in  
18 metabolism—including lactate metabolism—are important feature of ALS<sup>39,63</sup>. For  
19 example, reduced levels of lactate and MCT1 are found in spinal cords of SOD1<sup>G93A</sup>  
20 mice and motor cortex tissue of ALS patients carrying pathogenic SOD1 mutations,  
21 patient fibroblast-derived oligodendrocytes<sup>64–66</sup>, as well as in cultured astrocytes with  
22 TDP-43 inclusions<sup>67</sup>. Furthermore, lactate supplementation increases the survival of  
23 ALS model motor neurons *in vitro*<sup>65</sup> and increases ATP production and survival in an *in*  
24 *vitro* model of glutamate induced neurotoxicity, a process associated with ALS  
25 pathology<sup>68</sup>. The expression of key rate-limiting enzymes in glycolysis (PFKP and  
26 PFKM) as well as flux through the pentose phosphate pathway (G6PD) are increased in  
27 spinal cord tissue and iPSC-derived neurons from ALS patients with TDP-43  
28 proteinopathy<sup>69</sup>, findings that are similar to the accumulation of glycolytic intermediates  
29 and increased activity of G6PD in LDH SCKO animals (**Fig. 3, 3S**). While astrocyte and  
30 oligodendrocyte lactate shuttling are important for motor neuron survival<sup>64</sup>, SC lactate  
31 shuttling could be particularly important for maintaining distal motor axons and the

1 NMJs. Indeed, in ALS models and patient autopsy tissue, NMJ pathology is correlated  
2 with the extent of motor deficits and axon degeneration precedes motor neuron cell  
3 death<sup>70–72</sup>. These findings highlight the importance of axon-SC metabolic coupling as a  
4 potential driver of peripheral ALS pathology.

5  
6 Our unexpected discovery that disrupted LDH activity in SCs provokes motor-  
7 selective pathology reveals an essential difference between sensory and motor axons  
8 with implications for the pathogenesis and treatment of motor-dominated conditions  
9 including ALS. Only a few metabolic intervention strategies have been investigated in  
10 preclinical and early-stage clinical trials for ALS<sup>63</sup>. Therapeutic strategies to enhance  
11 glycolysis show some promise in models of ALS and other neurodegenerative  
12 diseases<sup>73</sup>, but given signs of glycolytic compensation in human neurons with ALS  
13 pathology<sup>69</sup>, and the dependence of motor neuron health on lactate metabolism, it is  
14 reasonable to consider targeting cellular metabolism in a manner that restores  
15 mitochondrial ATP production while circumventing impaired glycolysis<sup>74</sup>. Treatments  
16 that seek to replace glucose as a cellular fuel source—such as through supplementation  
17 with pyruvate, lactate and other substrates—or to otherwise ramp up TCA cycling and  
18 mitochondrial oxidative phosphorylation, have shown some success (reviewed in<sup>63,74–</sup>  
19 <sup>76</sup>). Ultimately, metabolic strategies that account for the lactate-dependence of motor  
20 axons and NMJs may be useful in targeting dysregulated metabolism in ALS.

21

## 1 **Funding**

2

3 This work was supported by National Institutes of Health grants (R01NS119812 to AJB,  
4 AD and JM, R01NS087632 to AD and JM, R37NS065053 to AD, RF1AG013730 to JM,  
5 K99/R00 CA218869 to JEI, and R21 CA242221 JEI. This work was also supported by  
6 the Needleman Center for Neurometabolism and Axonal Therapeutics, Washington  
7 University Institute of Clinical and Translational Sciences which is, in part, supported by  
8 the NIH/National Center for Advancing Translational Sciences (NCATS), CTSA grant  
9 #UL1 TR002345. It was also supported by tnd the Alvin J. Siteman Cancer Center  
10 Investment Program / The Foundation for Barnes-Jewish Hospital (JEI) and the Barnard  
11 Research Fund (JEI).

12

## 13 **Acknowledgments**

14

15 We would like to thank members of the DiAntonio and Milbrandt labs for their thoughtful  
16 feedback on this work. We would like to thank Cassidy Menendez, Rachel McClarney,  
17 Liya Yuan, and Alicia Neiner for their technical support. We also thank the Washington  
18 University Core for Cellular Imaging (WUCCI) for their technical support, expertise, and  
19 training. We also thank the Genome Engineering & Stem Cell Center (GESCC@MGI) at  
20 Washington University for generating transgenic mice.

21

22

23

24

25

26

1 **Figure Legends**

2

3 **Figure 1: Deletion of LDH in motor but not sensory neurons leads to neuropathy.**

4 Motor function in motor neuron-specific LDH KO (MNKO) and wildtype (WT) control  
5 mice was assessed by measuring latency to fall from an inverted screen **(A)**.

6 Mechanical sensation was assessed in sensory neuron-specific LDH KOs (SNKO) and  
7 controls by the Von Frey test **(B)** and heat sensation was assessed by the tail flick

8 withdrawal assay **(C)**. Representative toluidine blue-stained sural (sensory) nerves from  
9 12 month-old control and SNKO mice **(D,E)** and femoral (motor) nerves from MNKO

10 mice **(H,I)** with controls. Red arrows indicate aberrant and degenerated axons. Graphs  
11 show the density of normal axons and degenerating axons, and the distribution of axon  
12 diameters in SNKO and control sural nerves **(F,G)**, and MNKO and control femoral  
13 nerves **(J,K)**.

14

15 **Figure 2: Deletion of LDH in motor neurons causes muscle denervation, LDH  
16 deletion from motor neurons or Schwann cells does not cause motor neuron loss  
17 in the spinal cord.** NMJs on 12-month-old control and MNKO lumbrical muscles

18 stained in green to detect the synaptic vesicle marker synaptic vesicle glycoprotein 2A  
19 (SV2) and axon marker neurofilament medium chain (NF) and in red with the post-

20 synaptic endplate ligand bungarotoxin (BTX) **(A,B)**. Percent of the lumbrical muscle  
21 endplates innervated by apposed pre-synaptic structures **(C)**. Average ChAT+ motor

22 neurons per section of spinal cords counted in 12-month old MNKO, Schwann cell KO  
23 (SCKO) and control mice **(D)**. Sciatic nerves from 3-month-old SCKO mice show

24 reduced *Idha* and *Idhb* gene expression by QPCR **(E)**. Total lactate detected in 3-  
25 month-old sciatic nerves cultured 24 hours *ex vivo* **(F)**.

26

27 **Figure 3: Deletion of LDH in Schwann cells alters glycolytic metabolites in sciatic  
28 nerves and causes motor but not sensory defects.**

29 Metabolic analysis of glycolysis in 3-month-old SCKO sciatic nerves **(A-F)**. Metabolites  
30 in gray were undetected, metabolites in black were unchanged, and metabolites in red

31 were upregulated. ATP **(F)** was significantly reduced. n=3-5 mice, \*p<0.05 using a

1 Student's t-test between genotypes at each time point. Behavioral and  
2 electrophysiological tests were performed to assay motor (**G-K**) and sensory (**L-O**)  
3 function at 3, 6, and 12-month old mice, including inverted screen (**G**) forelimb grip  
4 strength in male mice (**H**), measurement of Compound Muscle Action Potential (CMAP)  
5 at the Sciatic Notch Amplitude (**I,J**) and latency (**K**), Sensory Nerve Action Potential  
6 (SNAP) amplitude and conduction velocity (CV) measured from the tail (**L,M**),  
7 mechanical sensitivity assessed via Von Frey test (**N**) and thermal sensitivity  
8 determined by latency to respond to submerging the mouse's tail in a 50°C water bath  
9 (**O**), n≥6 mice.

10

11 **Figure 4: Sciatic nerves from SCKO mice have defects in a subpopulation of**  
12 **myelinated axons.** Distal sciatic nerve cross-sections stained with Toluidine blue at 3,  
13 6, and 12 months of age in WT and SCKO mice. Blue pseudo-coloring indicates  
14 affected sectors (**A-L**). At 3 months of age, SCKO nerves appear grossly normal, except  
15 for the presence of tomacula (**J** orange arrow). At 6 months, affected sectors in SCKO  
16 nerves have naked axons (**K** yellow arrows) and degenerated axons (**K** pink arrow). At  
17 12 months, most axons in affected sectors of SCKO nerves have defects, including  
18 onion bulbs (**L** blue arrows), regenerating clusters (**L** green arrows), and degenerating  
19 axons (**L** pink arrow).

20

21 **Figure 5: Detailed histomorphometry reveals progressive axon degeneration in**  
22 **SCKO mice.** Average G-Ratio (**A**), density of normal axons (**B**), and degenerating  
23 axons (**C**) in sciatic nerves of WT and SCKO mice at 3, 6 and 12 months of age, n = 3-  
24 5 mice. Representative images of a normal axon (**D**), an onion bulb (**E**), a regenerating  
25 cluster (**F**), and a tomacula (**G**).

26

27 **Figure 6: Motor nerves show more severe defects than sensory nerves in SCKO**  
28 **mice.** Toluidine blue-stained (sensory) sural and (motor) femoral nerves from 12-month-  
29 old WT and SCKO mice (**A-H**). Blue arrows indicate onion bulbs, green arrows indicate  
30 regenerating clusters, and pink arrows indicate degenerated axons. Density of normal  
31 and degenerating axons (**I**), the average axon diameter (**J**), and the distribution of axon

1 diameters (**K**) in 12-month old WT and SCKO sural nerves. Density of normal and  
2 degenerating axons (**L**), the average axon diameter (**M**), and the distribution of axon  
3 diameters (**N**) in 12-month old WT and SCKO femoral nerves, n=3-4.

4  
5 **Figure 7: Muscle denervation and atrophy evident in SCKO mice.** NMJs on 12-  
6 month-old control and SCKO lumbrical muscles stained in green to detect the synaptic  
7 vesicle marker synaptic vesicle glycoprotein 2A (SV2) and axon marker neurofilament  
8 medium chain (NF) and in red with the post-synaptic endplate ligand bungarotoxin  
9 (BTX) (**A,B**). Percent of the lumbrical muscle endplates innervated by apposed pre-  
10 synaptic structures (**C**). Representative images of tibialis anterior muscle cross-sections  
11 stained with laminin from 18-month-old WT and SCKO mice (**D,E**) with quantification of  
12 muscle fiber area (**F**), n = 3-9 mice.

13  
14 **Supplemental Figure S1:** Measurement of Compound Muscle Action Potential (CMAP)  
15 at the Sciatic Notch Amplitude (**A,B**) and latency (**C**) in MNKO mice. Sensory Nerve  
16 Action Potential (SNAP) amplitude and conduction velocity (CV) measured from the tail  
17 (**H,I**) in SNKO mice.

18  
19 **Supplemental Figure S2:** To assess metabolic flux, 3-month-old sciatic nerves were  
20 incubated in glucose-free media supplemented with  $^{13}\text{C}_6$  glucose for 24 hours *ex vivo*.  
21 Total lactate detected (**A**). Diagram showing carbon isotope labeling of glucose and its  
22 production of labeled pyruvate and lactate (**B**). (Total lactate measured in M+0  
23 (Unlabeled), M+1, M+2, M+3 (3 carbons labeled, the direct product of glycolytic  
24 pyruvate) (**C**). \*p<0.05 using a Student's t-test between genotypes for (B-C). \*p<0.05  
25 using a Student's t-test between genotypes for each gene (A). n = 3-12 mice.

26  
27 **Supplemental Figure S3:** Metabolic analysis the pentose phosphate pathway (**A-D**),  
28 and purine metabolism (**E-H**). Metabolites in gray were undetected, metabolites in black  
29 were unchanged, and metabolites in red were upregulated. n=3-5 mice. \*p<0.05 using a  
30 Student's t-test between genotypes at each time point. (**I**) The activity of Glucose-6-  
31 phosphate dehydrogenase (G6PDH), the rate-limiting step in the pentose phosphate

1 pathway, is significantly increased in SCKO mice. n=3-5 mice. \*p<0.05 using a  
2 Student's t-test between genotypes at each time point.

3

4 **Supplemental Figure S4: (A-D)** Toluidine blue-stained sciatic nerves from WT and  
5 SCKO mice at postnatal day 7 and 21. Quantification of the number of myelinated  
6 axons **(E)** or Schwann cell nuclei **(F)** in WT or SCKO mice at postnatal day 7 and 21.  
7 n=3 mice. Scale = 20  $\mu\text{m}$ .

8

9 **Supplemental Figure S5: (A)** Toluidine blue-stained sciatic nerves from WT and SCKO  
10 mice at 14 days after sciatic nerve crush injury. Quantification of the number of  
11 myelinated axons **(A)**, naked axons **(B)**, nuclei **(C)**, or foamy macrophages **(D)** in WT or  
12 SCKO mice at postnatal day 7 and 21. n=3-4 mice. Scale = 20  $\mu\text{m}$ .

13

14 **Supplemental Figure S6: (A-F)** Whole nerve cross-sections of toluidine blue-stained  
15 proximal sciatic nerves from WT and SCKO mice at 3, 6, and 12 months of age. Scale =  
16 100  $\mu\text{m}$ . **(G-L)** Zoomed in images of proximal sciatic nerves from WT and SCKO mice at  
17 3, 6, and 12 months of age. Orange arrows indicate tomacula. Yellow arrows indicate  
18 naked axons. Pink arrows indicate degenerated axons. The Blue arrow indicates an  
19 onion bulb. The green arrow indicates a regenerating cluster. Scale = 20  $\mu\text{m}$ .

20

21 **Supplemental Figure S7:** Sensory nerve endings do not degenerate in SCKO mice.  
22 **(A-D)** Representative images of WT and SCKO mouse footpad skin stained with the  
23 pan-axonal marker PGP9.5 (red) and the nuclear marker DAPI (blue). The dashed white  
24 line shows the basement membrane. Scale = 200  $\mu\text{m}$ . **(E)** Quantification of  
25 intraepidermal nerve fiber (INEF) density per mm of basement membrane. n = 3-9 mice.  
26 \*p<0.05 using a Student's t-test between genotypes for each category of innervation.

27

## 1   **References Cited**

- 2
- 3   1.    Nave, K.-A. Myelination and support of axonal integrity by glia. *Nature* **468**, 244–
- 4       52 (2010).
- 5   2.    Viader, A. *et al.* Aberrant schwann cell lipid metabolism linked to mitochondrial
- 6       deficits leads to axon degeneration and neuropathy. *Neuron* **77**, 886–898 (2013).
- 7   3.    Viader, A. *et al.* Schwann cell mitochondrial metabolism supports long-term
- 8       axonal survival and peripheral nerve function. *J Neurosci* **31**, 10128–10140
- 9       (2011).
- 10 4.    Fünfschilling, U. *et al.* Glycolytic oligodendrocytes maintain myelin and long-term
- 11       axonal integrity. *Nature* **485**, 517 (2012).
- 12 5.    Beirowski, B. *et al.* Metabolic regulator LKB1 is crucial for Schwann cell-mediated
- 13       axon maintenance. *Nat. Neurosci.* **17**, 1351–61 (2014).
- 14 6.    Beirowski, B., Wong, K. M., Babetto, E. & Milbrandt, J. mTORC1 promotes
- 15       proliferation of immature Schwann cells and myelin growth of differentiated
- 16       Schwann cells. *Proc. Natl. Acad. Sci.* **114**, E4261–E4270 (2017).
- 17 7.    Norrmén, C. *et al.* mTORC1 controls PNS myelination along the mTORC1-RXR $\gamma$ -
- 18       SREBP-lipid biosynthesis axis in Schwann cells. *Cell Rep.* **9**, 646–660 (2014).
- 19 8.    Kim, S. *et al.* Schwann Cell O-GlcNAc Glycosylation Is Required for Myelin
- 20       Maintenance and Axon Integrity. *J. Neurosci.* **36**, 9633–9646 (2016).
- 21 9.    Feldman, E. L., Nave, K. A., Jensen, T. S. & Bennett, D. L. H. New Horizons in
- 22       Diabetic Neuropathy: Mechanisms, Bioenergetics, and Pain. *Neuron* **93**, 1296–
- 23       1313 (2017).
- 24 10.   Chen, Y.-J. *et al.* Lactate metabolism is associated with mammalian mitochondria.
- 25       *Nat. Chem. Biol.* **12**, 937–943 (2016).
- 26 11.   Brown, A. M., Evans, R. D., Black, J. & Ransom, B. R. Schwann cell glycogen
- 27       selectively supports myelinated axon function. *Ann. Neurol.* **72**, 406–18 (2012).
- 28 12.   Boučanova, F. *et al.* Disrupted function of lactate transporter MCT1, but not
- 29       MCT4, in Schwann cells affects the maintenance of motor end-plate innervation.
- 30       *Glia* **69**, 124–136 (2021).
- 31 13.   Jha, M. K. *et al.* Monocarboxylate transporter 1 in Schwann cells contributes to



- 1 maintenance of sensory nerve myelination during aging. *Glia* **68**, 161–177  
2 (2020).
- 3 14. Ždravlević, M. *et al.* Double genetic disruption of lactate dehydrogenases A and B  
4 is required to ablate the “Warburg effect” restricting tumor growth to oxidative  
5 metabolism. *J. Biol. Chem.* **293**, 15947–15961 (2018).
- 6 15. Valvona, C. J., Fillmore, H. L., Nunn, P. B. & Pilkington, G. J. The Regulation and  
7 Function of Lactate Dehydrogenase A: Therapeutic Potential in Brain Tumor.  
8 *Brain Pathol.* **26**, 3–17 (2016).
- 9 16. Urbańska, K. & Orzechowski, A. Unappreciated role of LDHA and LDHB to control  
10 apoptosis and autophagy in tumor cells. *International Journal of Molecular*  
11 *Sciences* **20**, (2019).
- 12 17. MacK, N., Mazzi, E. A., Bauer, D., Flores-Rozas, H. & Soliman, K. F. A. Stable  
13 shRNA silencing of lactate dehydrogenase a (*ldha*) in human mda-mb-231 breast  
14 cancer cells fails to alter lactic acid production, glycolytic activity, ATP or survival.  
15 *Anticancer Res.* **37**, 1205–1212 (2017).
- 16 18. Wang, Y.-H. *et al.* Cell-state-specific metabolic dependency in hematopoiesis and  
17 leukemogenesis. *Cell* **158**, 1309–1323 (2014).
- 18 19. Rodríguez, C. I. *et al.* High-efficiency deleter mice show that FLP<sub>e</sub> is an  
19 alternative to Cre-loxP. *Nature genetics* **25**, 139–140 (2000).
- 20 20. Skarnes, W. C. *et al.* A conditional knockout resource for the genome-wide study  
21 of mouse gene function. *Nature* **474**, 337–342 (2011).
- 22 21. Feltri, M. L. *et al.* P0-Cre transgenic mice for inactivation of adhesion molecules in  
23 Schwann cells. *Ann. N. Y. Acad. Sci.* **883**, 116–123 (1999).
- 24 22. Rossi, J. *et al.* Melanocortin-4 receptors expressed by cholinergic neurons  
25 regulate energy balance and glucose homeostasis. *Cell Metab.* **13**, 195–204  
26 (2011).
- 27 23. Shields, S. D. *et al.* Nav1.8 expression is not restricted to nociceptors in mouse  
28 peripheral nervous system. *Pain* **153**, 2017–2030 (2012).
- 29 24. Hackett, A. R., Strickland, A. & Milbrandt, J. Disrupting insulin signaling in  
30 Schwann cells impairs myelination and induces a sensory neuropathy. *Glia* **68**,  
31 963–978 (2020).

- 1 25. Schildhaus, N. *et al.* Thermal latency studies in opiate-treated mice. *J. Pharm.*  
2 *Bioallied Sci.* **6**, 43–7 (2014).
- 3 26. Geisler, S. *et al.* Prevention of vincristine-induced peripheral neuropathy by  
4 genetic deletion of SARM1 in mice. *Brain* (2016). doi:10.1093/brain/aww251
- 5 27. Chaplan, S. R., Bach, F. W., Pogrel, J. W., Chung, J. M. & Yaksh, T. L.  
6 Quantitative assessment of tactile allodynia in the rat paw. *J. Neurosci. Methods*  
7 **53**, 55–63 (1994).
- 8 28. Beirowski, B. *et al.* Sir-two-homolog 2 (Sirt2) modulates peripheral myelination  
9 through polarity protein Par-3/atypical protein kinase C (aPKC) signaling. *Proc.*  
10 *Natl. Acad. Sci. U. S. A.* **108**, E952-61 (2011).
- 11 29. Sasaki, Y., Hackett, A. R., Kim, S., Strickland, A. & Milbrandt, J. Dysregulation of  
12 NAD<sup>+</sup> metabolism induces a Schwann cell dedifferentiation program. *J. Neurosci.*  
13 (2018). doi:10.1523/JNEUROSCI.3304-17.2018
- 14 30. Sponagel, J. *et al.* Sex Differences in Brain Tumor Glutamine Metabolism Reveal  
15 Sex-Specific Vulnerabilities to Treatment. *bioRxiv* (2021).  
16 doi:10.1101/2021.09.29.461531
- 17 31. Fiehn, O. Metabolomics by Gas Chromatography-Mass Spectrometry: Combined  
18 Targeted and Untargeted Profiling. *Curr. Protoc. Mol. Biol.* **114**, 30.4.1-30.4.32  
19 (2016).
- 20 32. Trefely, S., Ashwell, P. & Snyder, N. W. FluxFix: automatic isotopologue  
21 normalization for metabolic tracer analysis. *BMC Bioinformatics* **17**, 485 (2016).
- 22 33. Sasaki, Y., Hackett, A. R., Kim, S., Strickland, A. & Milbrandt, J. Dysregulation of  
23 NAD<sup>+</sup> Metabolism Induces a Schwann Cell Dedifferentiation Program. *J.*  
24 *Neurosci.* **38**, 6546–6562 (2018).
- 25 34. Peyronnard, J. -M & Charron, L. Motor and sensory neurons of the rat sural  
26 nerve: A horseradish peroxidase study. *Muscle Nerve* **5**, 654–660 (1982).
- 27 35. Badia, J., Pascual-Font, A., Vivó, M., Udina, E. & Navarro, X. Topographical  
28 distribution of motor fascicles in the sciatic-tibial nerve of the rat. *Muscle Nerve*  
29 **42**, 192–201 (2010).
- 30 36. Krajewski, K. M. *et al.* Neurological dysfunction and axonal degeneration in  
31 Charcot-Marie-Tooth disease type 1A. *Brain* **123** ( Pt 7), 1516–1527 (2000).

- 1 37. Jordanova, A. *et al.* Dominant intermediate Charcot-Marie-Tooth type C maps to  
2 chromosome 1p34-p35. *Am. J. Hum. Genet.* **73**, 1423–1430 (2003).
- 3 38. Vavlitou, N. *et al.* Axonal pathology precedes demyelination in a mouse model of  
4 X-linked demyelinating/type I Charcot-Marie Tooth neuropathy. *J. Neuropathol.*  
5 *Exp. Neurol.* **69**, 945–958 (2010).
- 6 39. Verkhatsky, A. *et al.* Astroglial asthenia and loss of function, rather than  
7 reactivity, contribute to the ageing of the brain. *Pflugers Arch.* **473**, 753–774  
8 (2021).
- 9 40. Williams, H. C. *et al.* APOE alters glucose flux through central carbon pathways in  
10 astrocytes. *Neurobiol. Dis.* **136**, 104742 (2020).
- 11 41. Muraleedharan, R. & Dasgupta, B. AMPK in the brain: its roles in glucose and  
12 neural metabolism. *FEBS J.* (2021). doi:10.1111/febs.16151
- 13 42. Engl, E. & Attwell, D. Non-signalling energy use in the brain. *Journal of*  
14 *Physiology* (2015). doi:10.1113/jphysiol.2014.282517
- 15 43. Navarrete, M. & Araque, A. The Cajal school and the physiological role of  
16 astrocytes: a way of thinking. *Front. Neuroanat.* **8**, (2014).
- 17 44. Tsacopoulos, M., Veuthey, A. L., Saravelos, S. G., Perrottet, P. & Tsoupras, G.  
18 Glial cells transform glucose to alanine, which fuels the neurons in the honeybee  
19 retina. *J. Neurosci.* **14**, 1339–1351 (1994).
- 20 45. Bonvento, G. & Bolaños, J. P. Astrocyte-neuron metabolic cooperation shapes  
21 brain activity. *Cell Metab.* **33**, 1546–1564 (2021).
- 22 46. Magistretti, P. J. & Allaman, I. Lactate in the brain: from metabolic end-product to  
23 signalling molecule. *Nat. Rev. Neurosci.* **19**, 235–249 (2018).
- 24 47. Brooks, G. A. The Science and Translation of Lactate Shuttle Theory. *Cell Metab.*  
25 **27**, 757–785 (2018).
- 26 48. Pellerin, L. & Magistretti, P. J. Glutamate uptake into astrocytes stimulates  
27 aerobic glycolysis: a mechanism coupling neuronal activity to glucose utilization.  
28 *Proc. Natl. Acad. Sci. U. S. A.* **91**, 10625–10629 (1994).
- 29 49. Volkenhoff, A. *et al.* Glial Glycolysis Is Essential for Neuronal Survival in  
30 *Drosophila*. *Cell Metab.* **22**, 437–447 (2015).
- 31 50. Trimarco, A. & Taveggia, C. Schwann cell energy to die for. *Nat. Neurosci.* **23**,

- 1 1179–1181 (2020).
- 2 51. Oh, S. *et al.* Changes in permeability caused by connexin 32 mutations underlie  
3 X-linked Charcot-Marie-Tooth disease. *Neuron* **19**, 927–938 (1997).
- 4 52. Bicego, M. *et al.* Selective defects in channel permeability associated with Cx32  
5 mutations causing X-linked Charcot-Marie-Tooth disease. *Neurobiol. Dis.* **21**,  
6 607–617 (2006).
- 7 53. Kleopa, K. A., Abrams, C. K. & Scherer, S. S. How do mutations in GJB1 cause  
8 X-linked Charcot-Marie-Tooth disease? *Brain Res.* **1487**, 198–205 (2012).
- 9 54. Shy, M. E. *et al.* CMT1X phenotypes represent loss of GJB1 gene function.  
10 *Neurology* **68**, 849–855 (2007).
- 11 55. Scherer, S. S. *et al.* Connexin32-null mice develop demyelinating peripheral  
12 neuropathy. *Glia* **24**, 8–20 (1998).
- 13 56. Sargiannidou, I. *et al.* Connexin32 mutations cause loss of function in Schwann  
14 cells and oligodendrocytes leading to PNS and CNS myelination defects. *J.*  
15 *Neurosci. Off. J. Soc. Neurosci.* **29**, 4736–4749 (2009).
- 16 57. Goebbels, S. *et al.* Genetic disruption of Pten in a novel mouse model of  
17 tomaculous neuropathy. *EMBO Mol. Med.* **4**, 486–499 (2012).
- 18 58. Pooya, S. *et al.* The tumour suppressor LKB1 regulates myelination through  
19 mitochondrial metabolism. *Nat. Commun.* **5**, 4993 (2014).
- 20 59. Ko, K. W., Devault, L., Sasaki, Y., Milbrandt, J. & DiAntonio, A. Live imaging  
21 reveals the cellular events downstream of SARM1 activation. *Elife* **10**, (2021).
- 22 60. Yim, A. K. Y. *et al.* Disentangling glial diversity in peripheral nerves at single-  
23 nuclei resolution. *Nat. Neurosci.* **25**, 238–251 (2022).
- 24 61. Argueti-Ostrovsky, S., Alfahel, L., Kahn, J. & Israelson, A. All Roads Lead to  
25 Rome: Different Molecular Players Converge to Common Toxic Pathways in  
26 Neurodegeneration. *Cells* **10**, (2021).
- 27 62. Niccoli, T., Partridge, L. & Isaacs, A. M. Ageing as a risk factor for ALS/FTD.  
28 *Hum. Mol. Genet.* **26**, R105–R113 (2017).
- 29 63. Tefera, T. W. & Borges, K. Metabolic Dysfunctions in Amyotrophic Lateral  
30 Sclerosis Pathogenesis and Potential Metabolic Treatments. *Front. Neurosci.* **10**,  
31 (2017).

- 1 64. Lee, Y. *et al.* Oligodendroglia metabolically support axons and contribute to  
2 neurodegeneration. *Nature* **487**, 443–448 (2012).
- 3 65. Ferraiuolo, L. *et al.* Dysregulation of astrocyte–motoneuron cross-talk in mutant  
4 superoxide dismutase 1-related amyotrophic lateral sclerosis. *Brain* **134**, 2627–  
5 2641 (2011).
- 6 66. Ferraiuolo, L. *et al.* Oligodendrocytes contribute to motor neuron death in ALS via  
7 SOD1-dependent mechanism. *Proc. Natl. Acad. Sci.* **113**, E6496–E6505 (2016).
- 8 67. Velebit, J. *et al.* Astrocytes with TDP-43 inclusions exhibit reduced noradrenergic  
9 cAMP and Ca(2+) signaling and dysregulated cell metabolism. *Sci. Rep.* **10**,  
10 6003 (2020).
- 11 68. Jourdain, P. *et al.* L-Lactate protects neurons against excitotoxicity: implication of  
12 an ATP-mediated signaling cascade. *Sci. Rep.* **6**, 21250 (2016).
- 13 69. Manzo, E. *et al.* Glycolysis upregulation is neuroprotective as a compensatory  
14 mechanism in ALS. *Elife* **8**, (2019).
- 15 70. Fischer, L. R. *et al.* Amyotrophic lateral sclerosis is a distal axonopathy: Evidence  
16 in mice and man. *Exp. Neurol.* (2004). doi:10.1016/j.expneurol.2003.10.004
- 17 71. Gould, T. W. *et al.* Complete dissociation of motor neuron death from motor  
18 dysfunction by Bax deletion in a mouse model of ALS. *J. Neurosci. Off. J. Soc.*  
19 *Neurosci.* **26**, 8774–8786 (2006).
- 20 72. Fischer, L. R. & Glass, J. D. Axonal degeneration in motor neuron disease.  
21 *Neurodegener. Dis.* **4**, 431–442 (2007).
- 22 73. Cai, R. *et al.* Enhancing glycolysis attenuates Parkinson's disease progression in  
23 models and clinical databases. *J. Clin. Invest.* **129**, 4539–4549 (2019).
- 24 74. Tefera, T. W., Steyn, F. J., Ngo, S. T. & Borges, K. CNS glucose metabolism in  
25 Amyotrophic Lateral Sclerosis: a therapeutic target? *Cell Biosci.* **11**, 14 (2021).
- 26 75. Tefera, T. W., Tan, K. N., McDonald, T. S. & Borges, K. Alternative Fuels in  
27 Epilepsy and Amyotrophic Lateral Sclerosis. *Neurochem. Res.* **42**, 1610–1620  
28 (2017).
- 29 76. Vandoorne, T., De Bock, K. & Van Den Bosch, L. Energy metabolism in ALS: an  
30 underappreciated opportunity? *Acta Neuropathol.* **135**, 489–509 (2018).

## Graphical Abstract

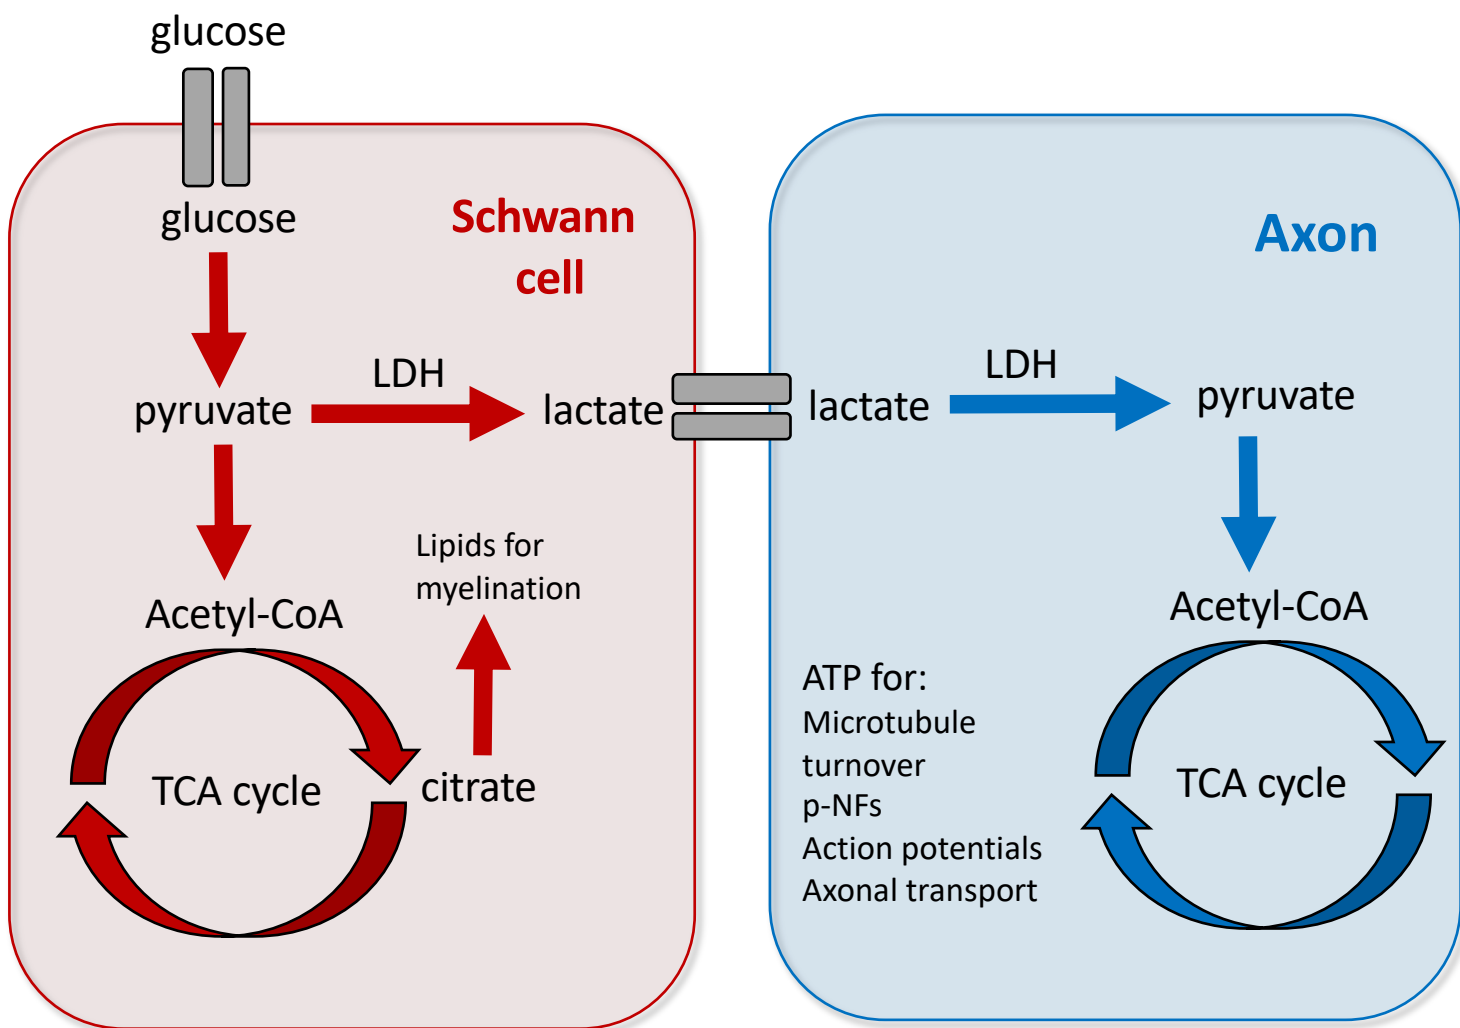

**Figure 1**

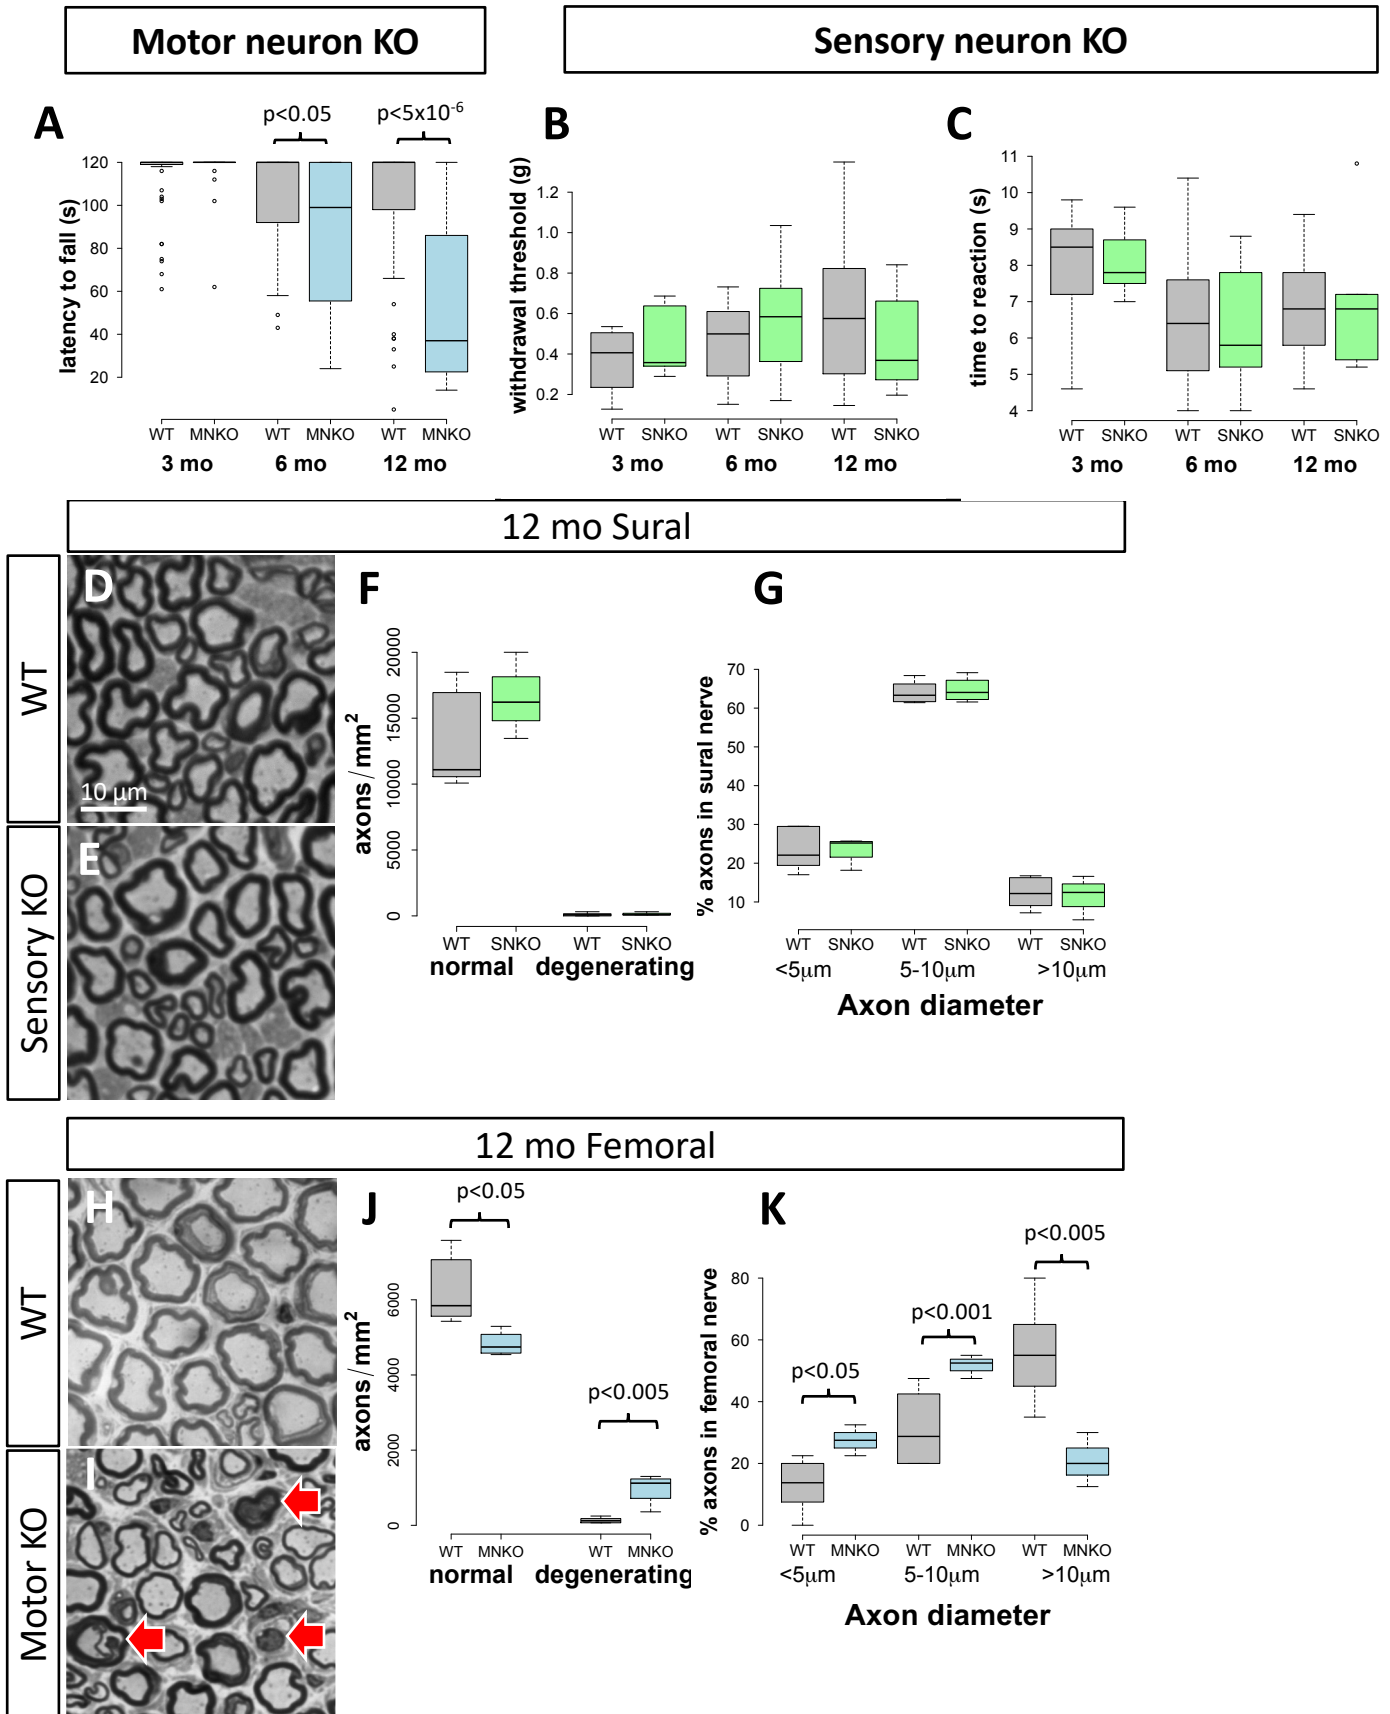

## Figure 2

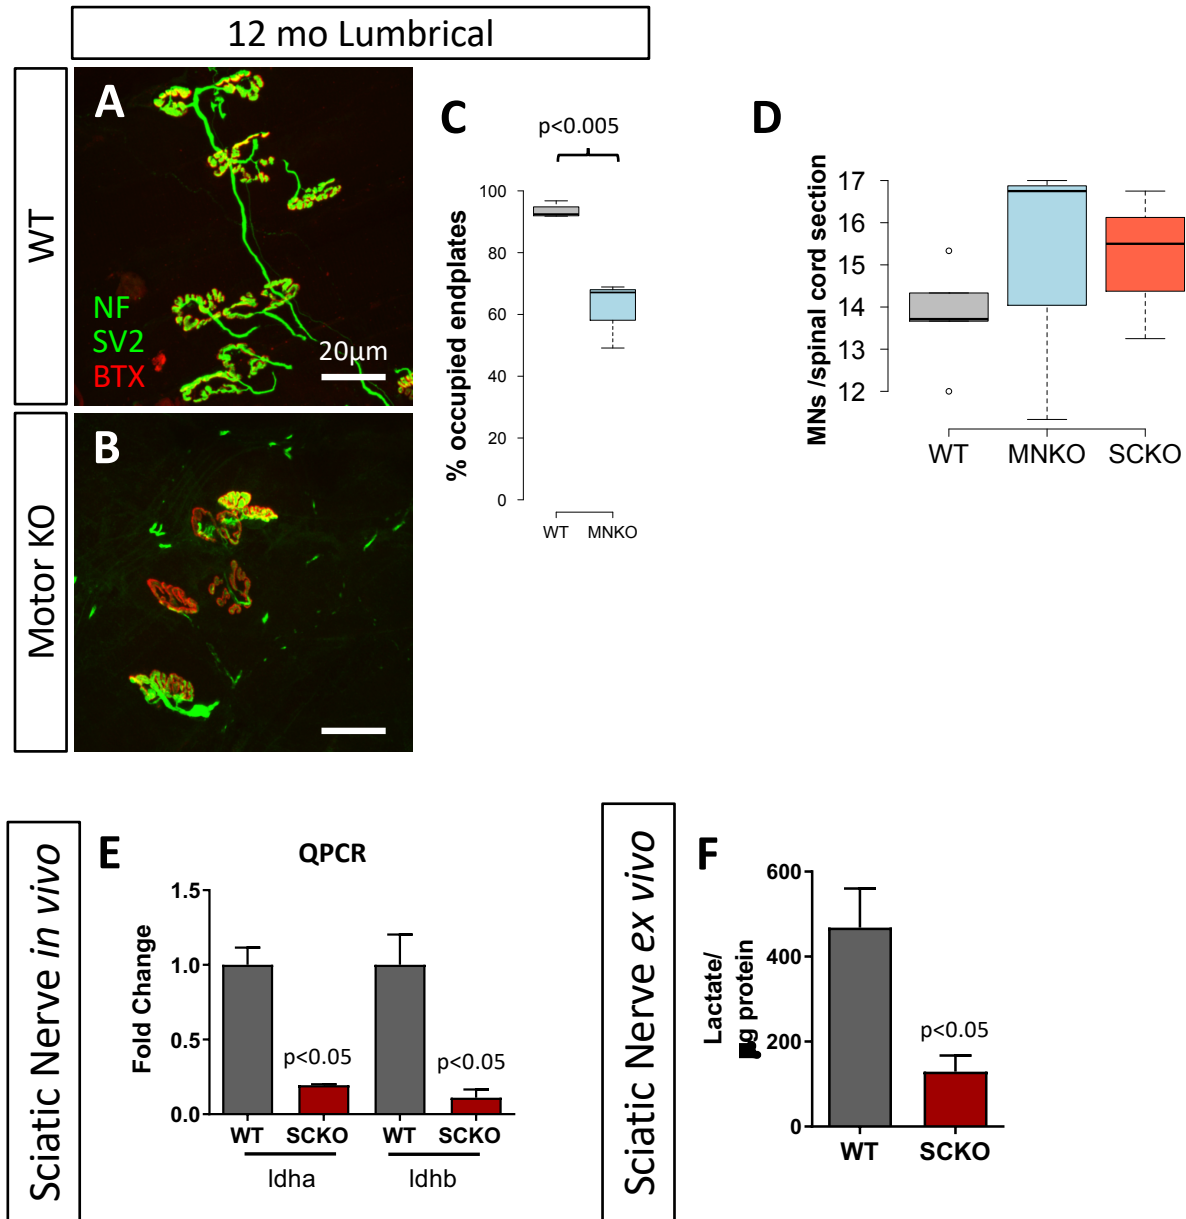



**Figure 3**

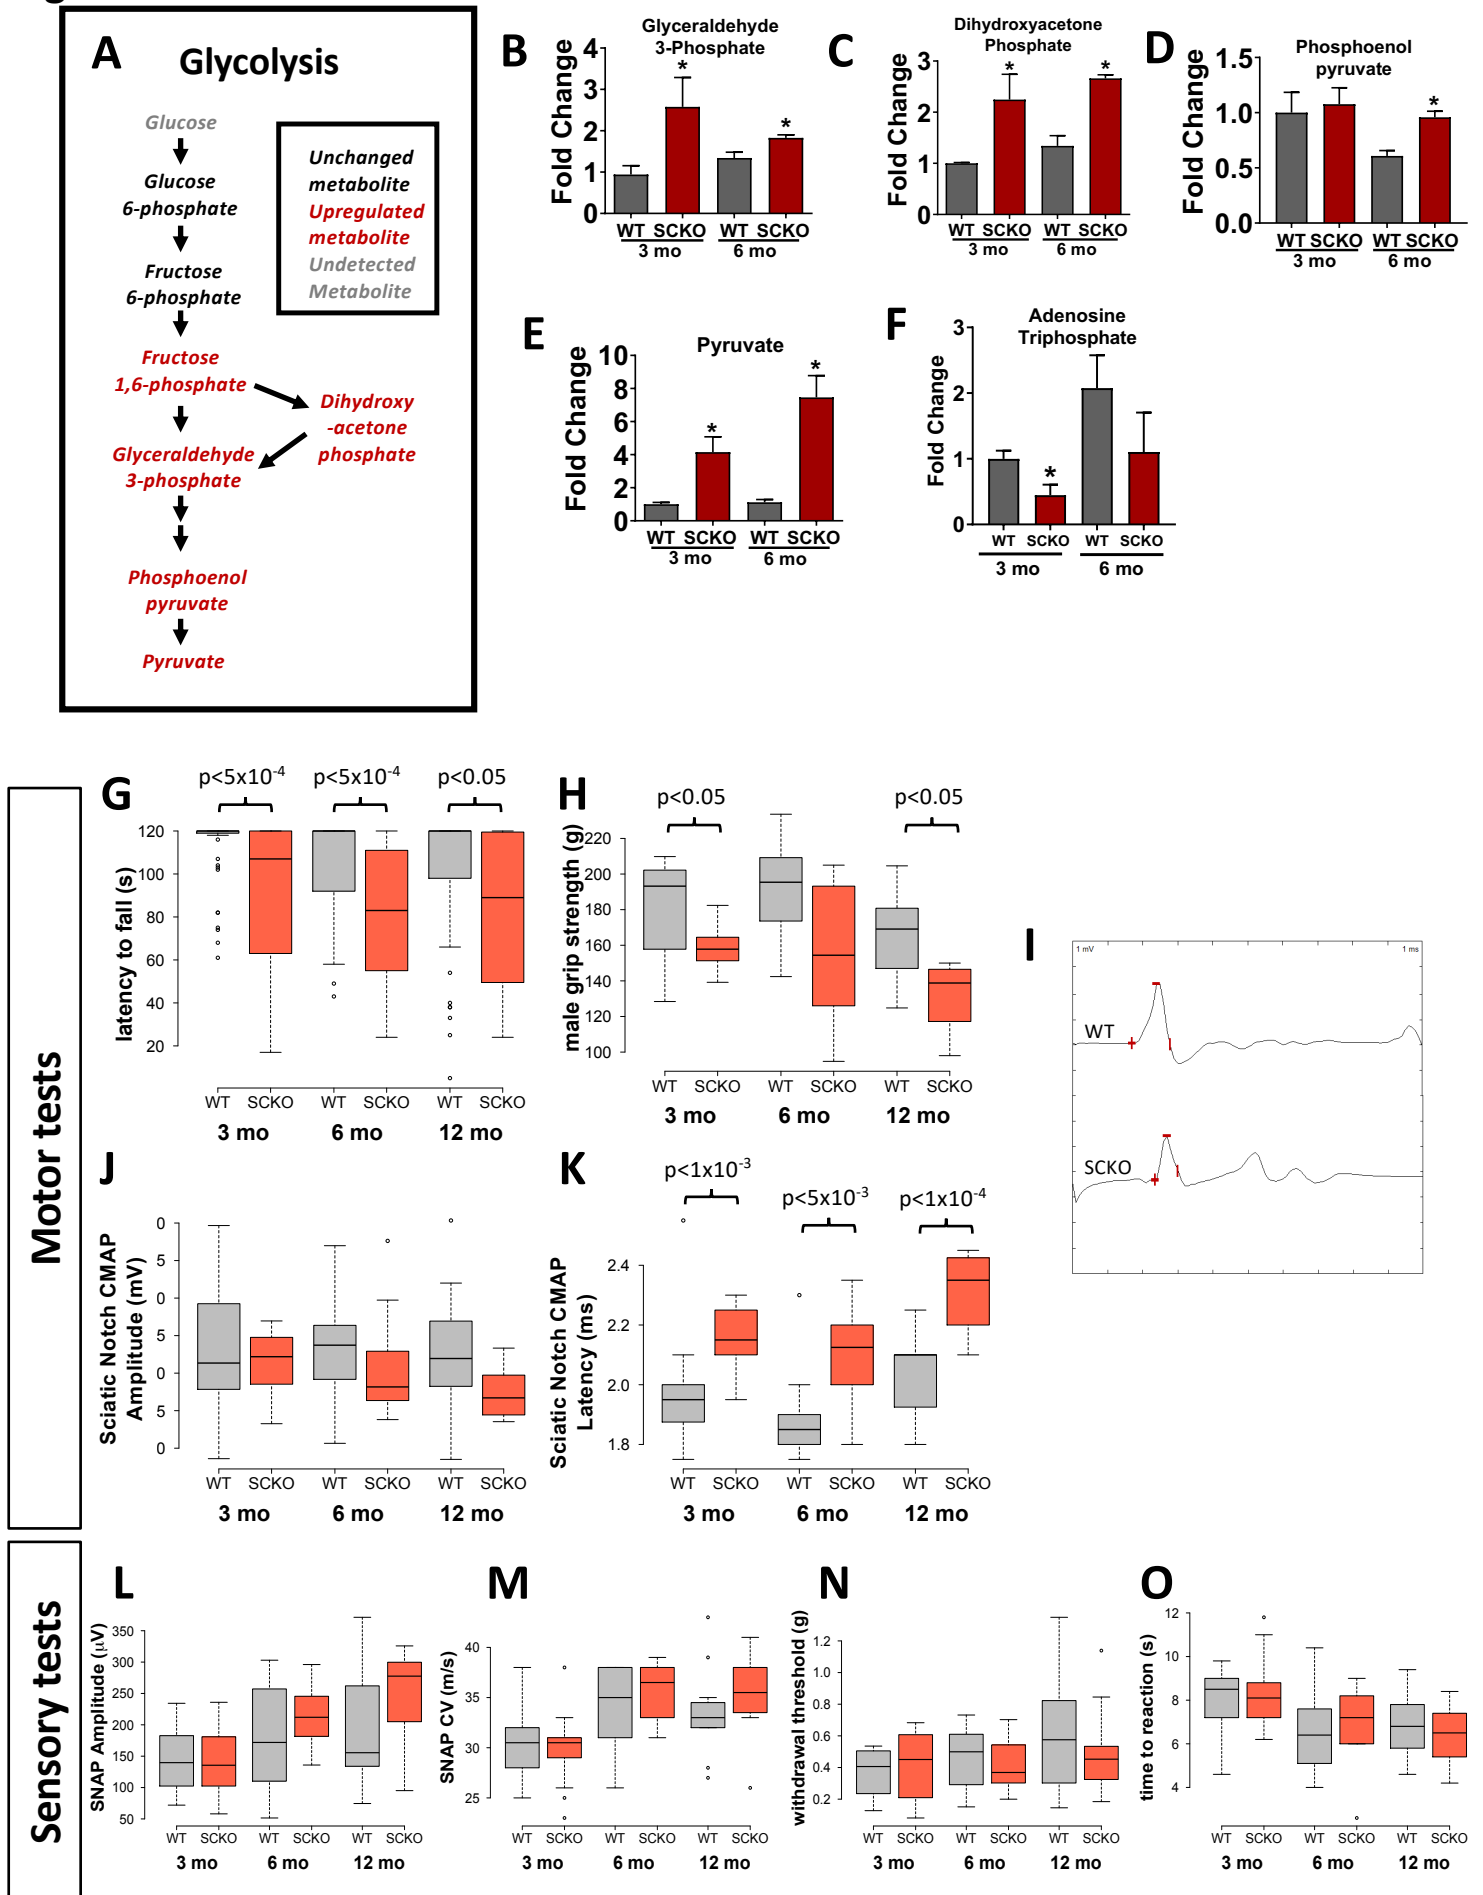

**Figure 4**

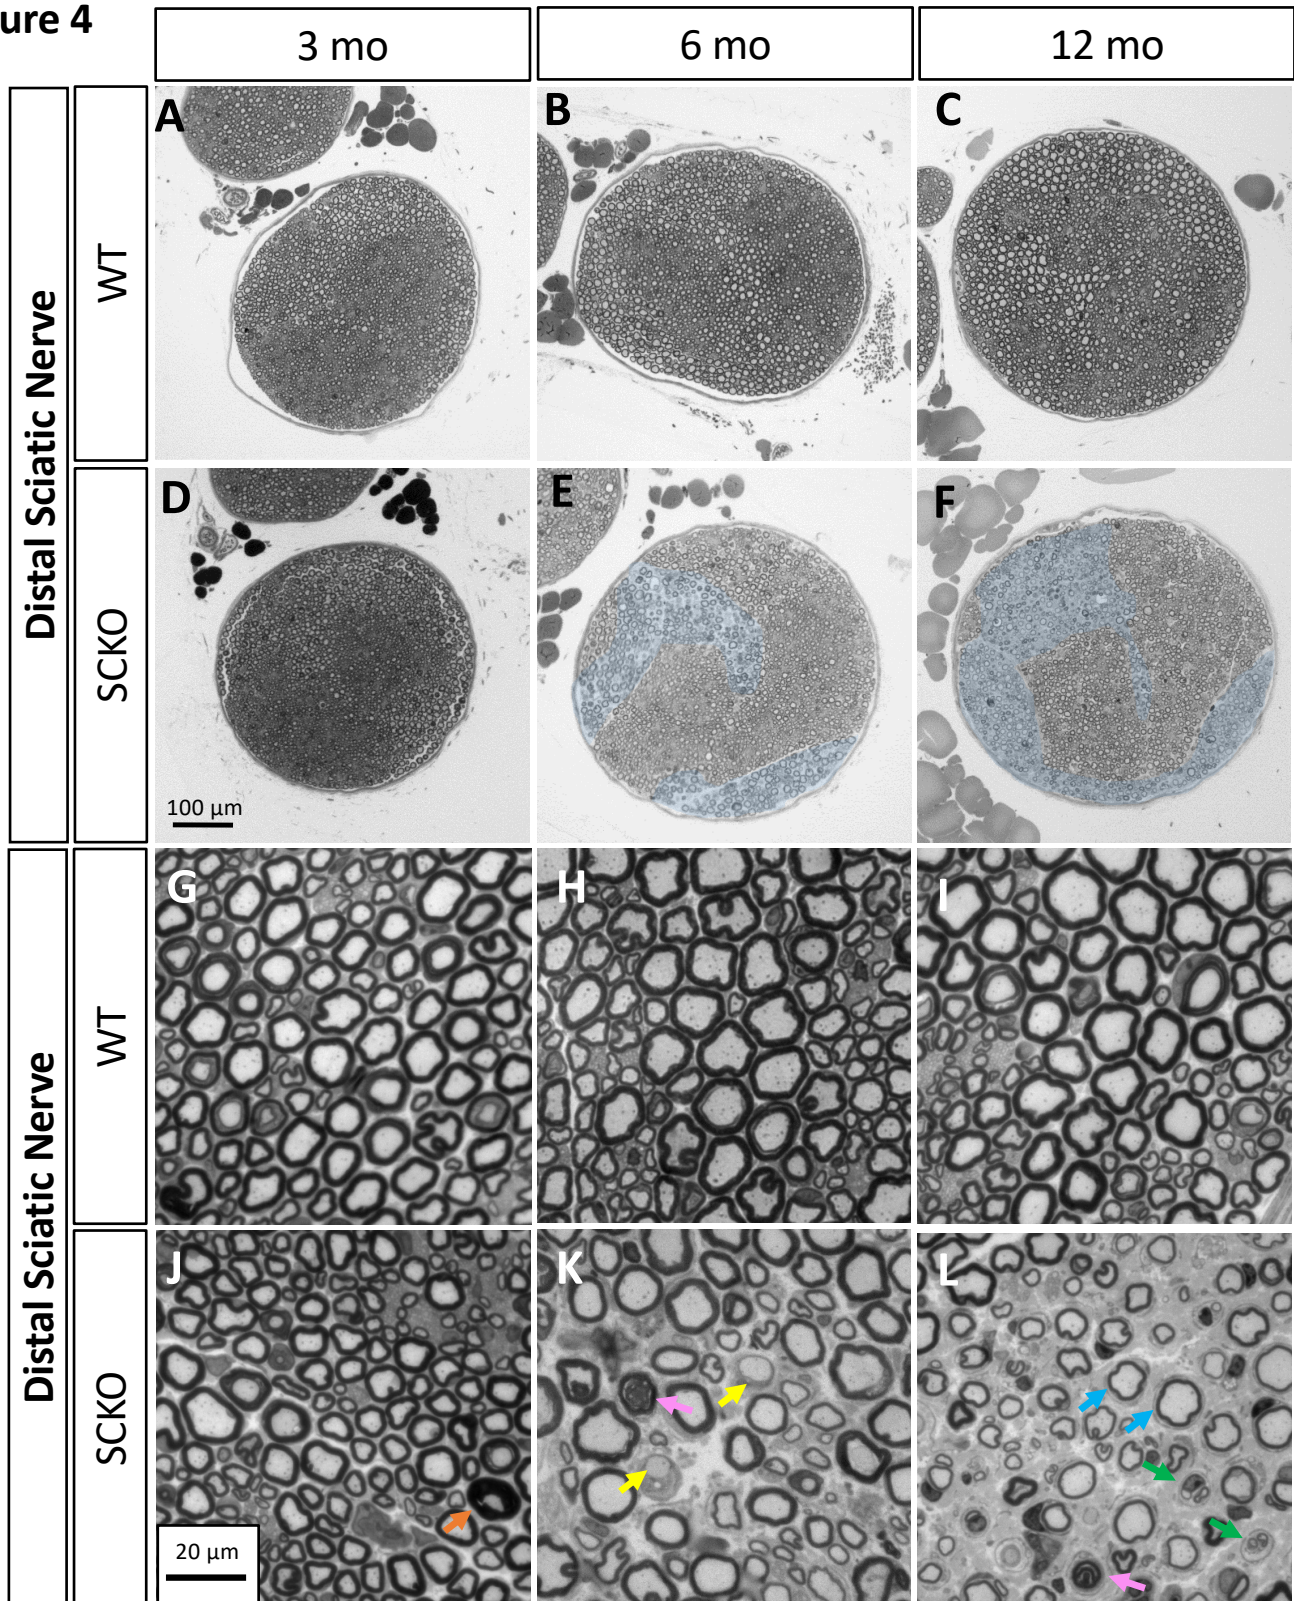

## Figure 5

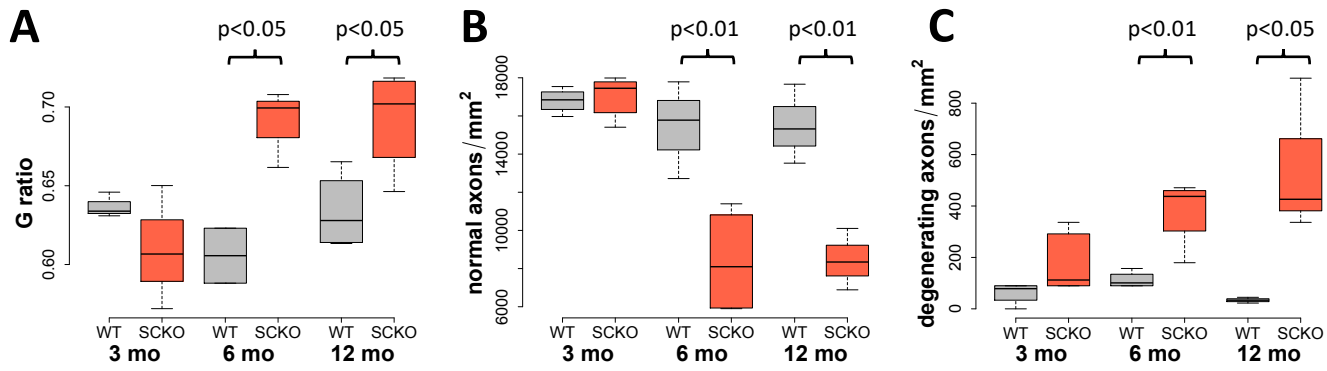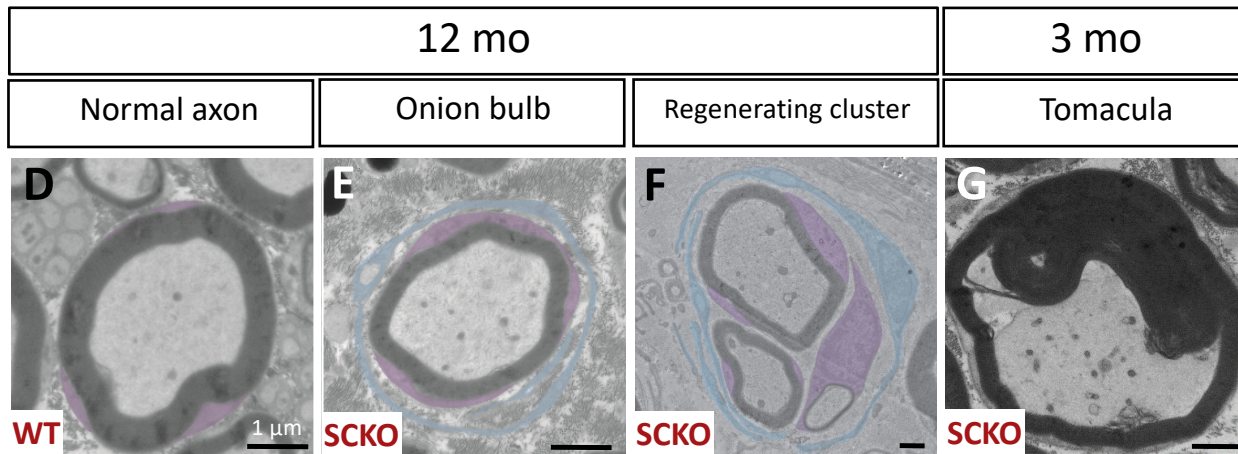

**Figure 6**

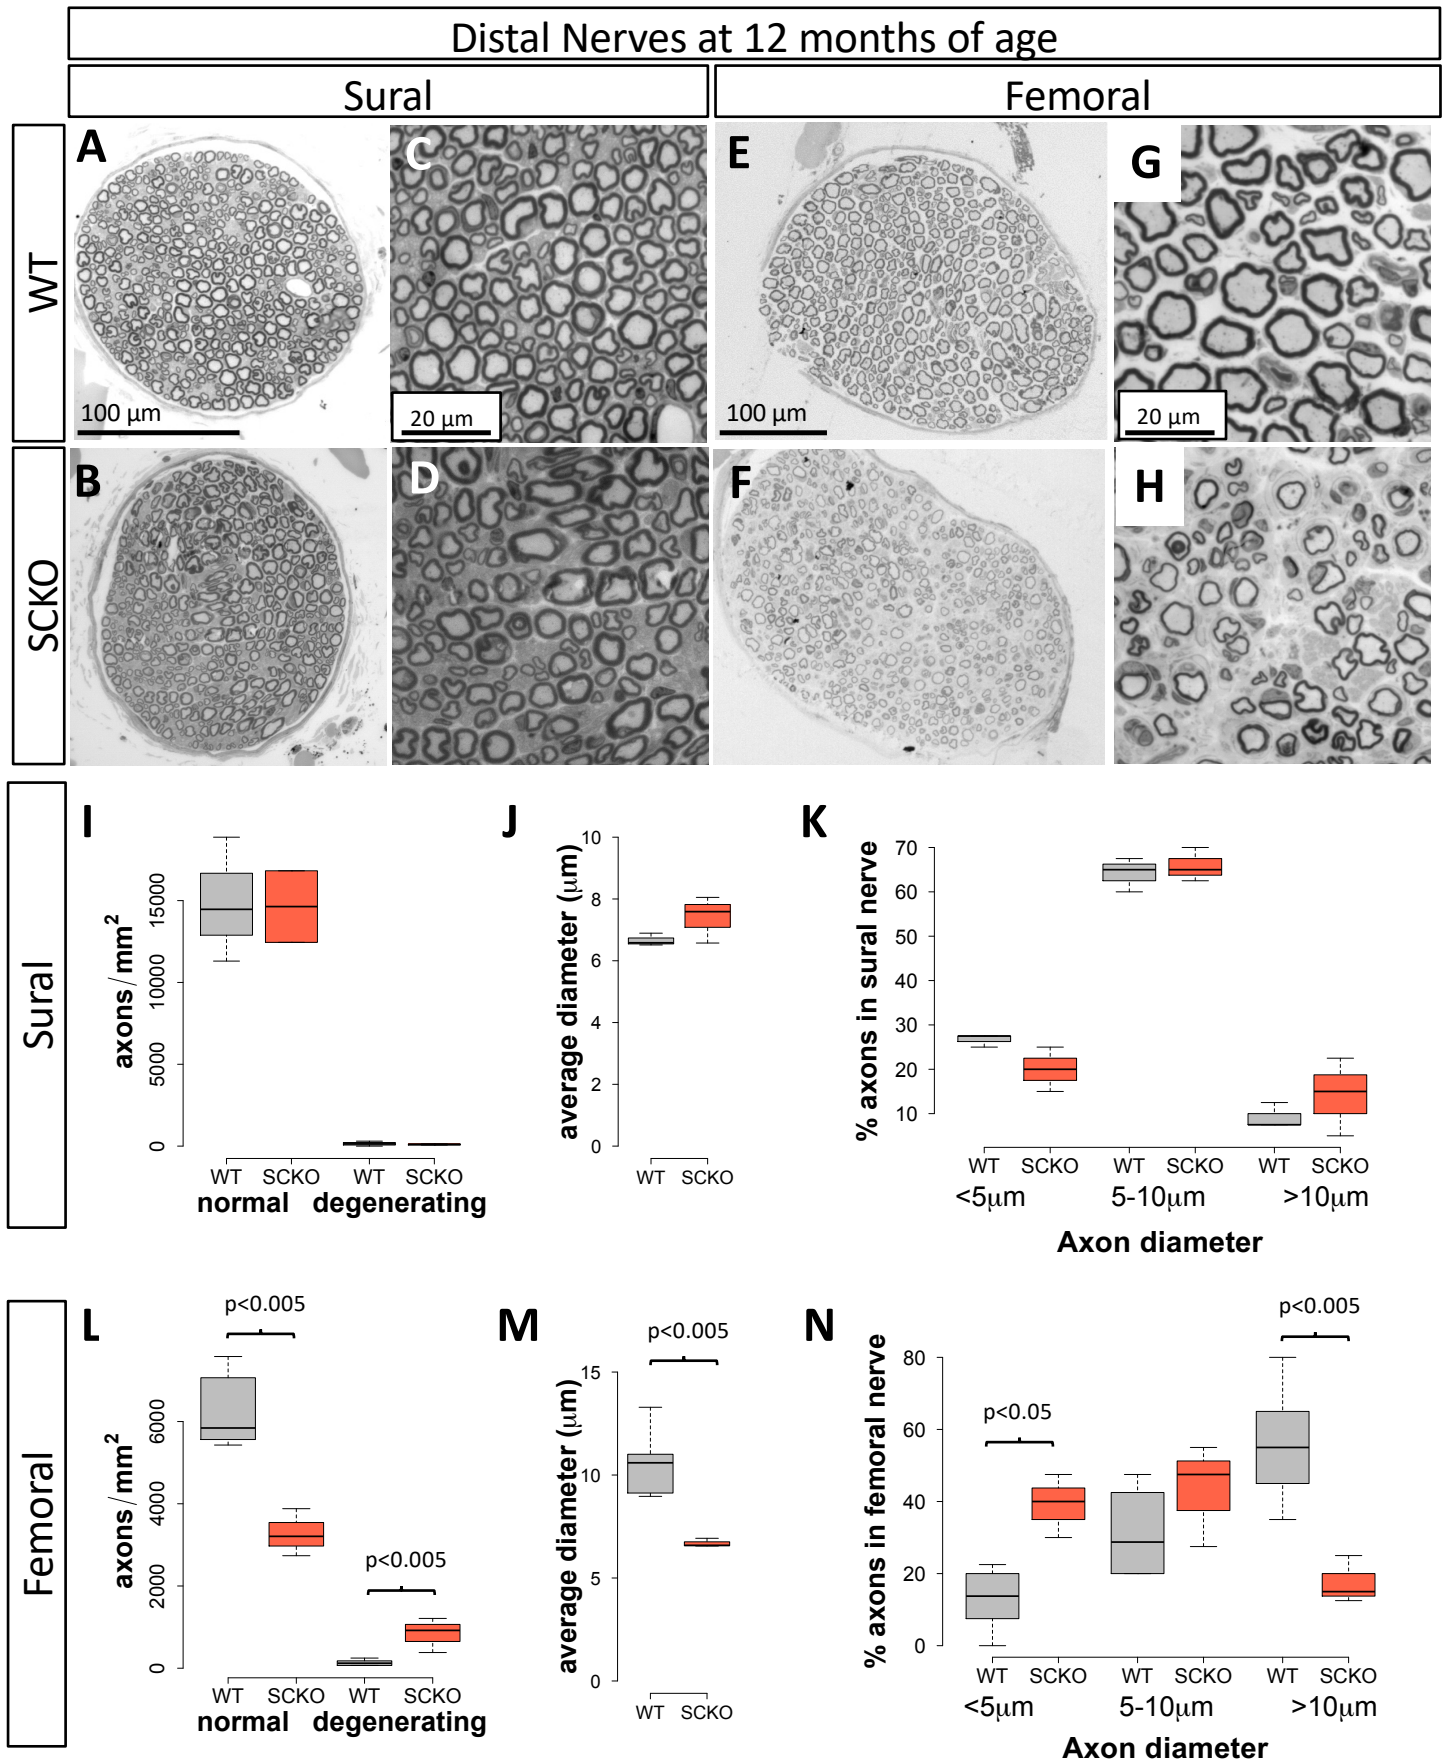

**Figure 7**

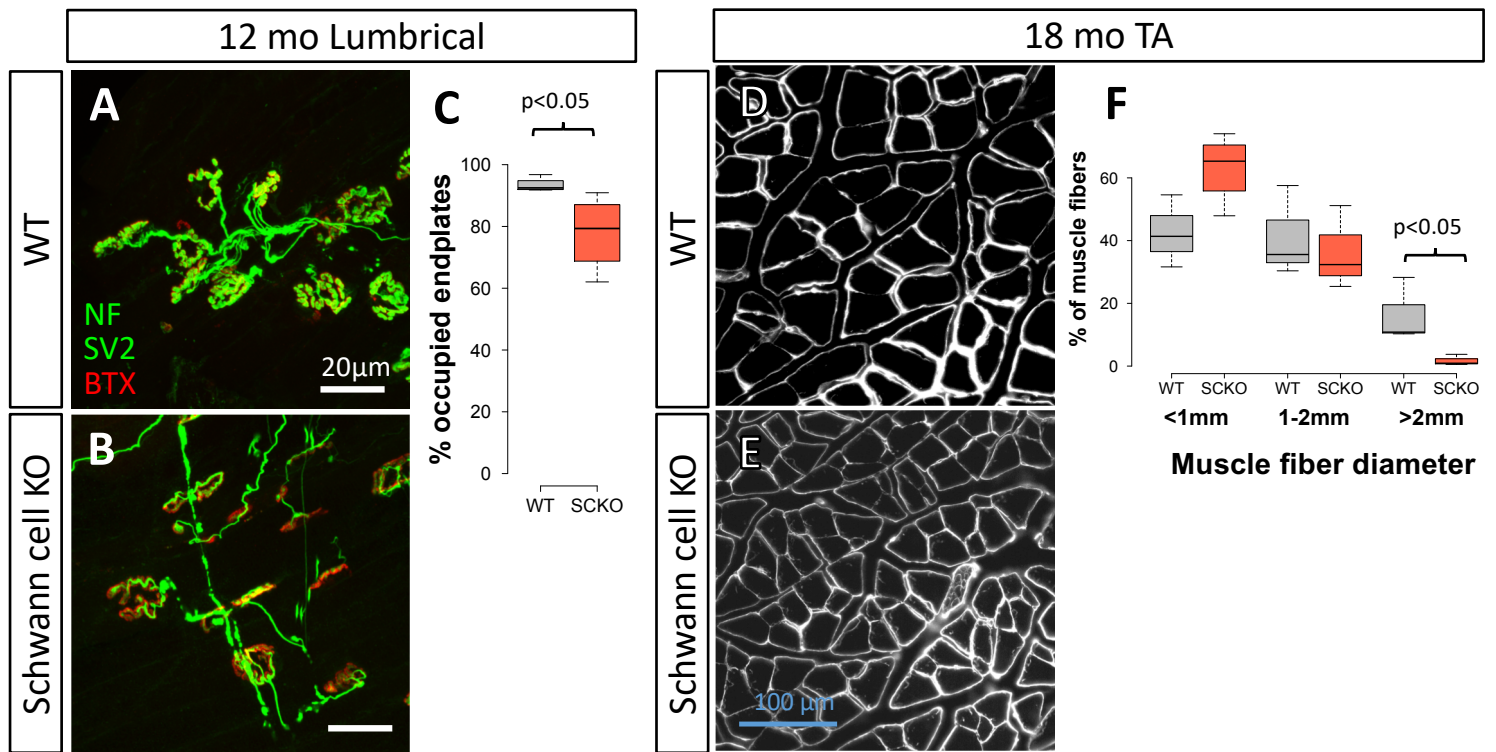

Source: http://biorxiv.org/content/10.1101/2022.06.29.497865v1.full.pdf
